# Supplementary material
Source: PubMed Central journal article supplement (PMC4433862)
Supplement: NIHMS641017-supplement-s2.pdf [file NIHMS641017-supplement-s2.pdf]

```

FACTOR
/VARIABLES BY_R601 BY_R602 BY_R603 BY_R604 BY_R605 BY_R606 BY_R607 BY_R608
BY_R609 BY_R610
/MISSING LISTWISE
/ANALYSIS BY_R601 BY_R602 BY_R603 BY_R604 BY_R605 BY_R606 BY_R607 BY_R608 B
Y_R609 BY_R610
/PRINT INITIAL EXTRACTION ROTATION
/FORMAT SORT
/CRITERIA MINEIGEN(1) ITERATE(25)
/EXTRACTION PAF
/CRITERIA ITERATE(25)
/ROTATION VARIMAX
/SAVE REG(ALL)
/METHOD=CORRELATION.

```

## Factor Analysis

[DataSet1] C:\Users\ridamian\Dropbox\PT\PT Paper\PT base year and follow up 1  
1-18-11\_Rodica2\_credible only\_1\_used for paper\_20.sav

### Communalities

|                    | Initial | Extraction |
|--------------------|---------|------------|
| Sociability        | .403    | .449       |
| Social sensitivity | .528    | .557       |
| Impulsiveness      | .103    | .149       |
| Vigor              | .379    | .460       |
| Calmness           | .487    | .528       |
| Tidiness           | .484    | .586       |
| Culture            | .516    | .576       |
| Leadership         | .315    | .364       |
| Self-confidence    | .255    | .238       |
| Mature personality | .581    | .635       |

Extraction Method: Principal Axis Factoring.

**Total Variance Explained**

| Factor | Initial Eigenvalues |               |              | Extraction Sums of Squared Loadings |               |              |
|--------|---------------------|---------------|--------------|-------------------------------------|---------------|--------------|
|        | Total               | % of Variance | Cumulative % | Total                               | % of Variance | Cumulative % |
| 1      | 4.644               | 46.442        | 46.442       | 4.153                               | 41.527        | 41.527       |
| 2      | 1.033               | 10.334        | 56.776       | .389                                | 3.895         | 45.422       |
| 3      | .849                | 8.494         | 65.271       |                                     |               |              |
| 4      | .699                | 6.987         | 72.257       |                                     |               |              |
| 5      | .650                | 6.503         | 78.760       |                                     |               |              |
| 6      | .566                | 5.657         | 84.417       |                                     |               |              |
| 7      | .482                | 4.819         | 89.236       |                                     |               |              |
| 8      | .413                | 4.131         | 93.367       |                                     |               |              |
| 9      | .357                | 3.571         | 96.938       |                                     |               |              |
| 10     | .306                | 3.062         | 100.000      |                                     |               |              |

**Total Variance Explained**

| Factor | Rotation Sums of Squared Loadings |               |              |
|--------|-----------------------------------|---------------|--------------|
|        | Total                             | % of Variance | Cumulative % |
| 1      | 2.888                             | 28.875        | 28.875       |
| 2      | 1.655                             | 16.547        | 45.422       |
| 3      |                                   |               |              |
| 4      |                                   |               |              |
| 5      |                                   |               |              |
| 6      |                                   |               |              |
| 7      |                                   |               |              |
| 8      |                                   |               |              |
| 9      |                                   |               |              |
| 10     |                                   |               |              |

Extraction Method: Principal Axis Factoring.

**Factor Matrix<sup>a</sup>**

|                    | Factor |       |
|--------------------|--------|-------|
|                    | 1      | 2     |
| Mature personality | .788   | -.118 |
| Social sensitivity | .743   | -.071 |
| Culture            | .742   | -.158 |
| Calmness           | .720   | -.096 |
| Tidiness           | .704   | -.301 |
| Sociability        | .629   | .232  |
| Vigor              | .628   | .256  |
| Leadership         | .574   | .187  |
| Self-confidence    | .474   | .118  |
| Impulsiveness      | .268   | .278  |

Extraction Method: Principal Axis Factoring.

a. 2 factors extracted. 8 iterations required.

**Rotated Factor Matrix<sup>a</sup>**

|                    | Factor |      |
|--------------------|--------|------|
|                    | 1      | 2    |
| Tidiness           | .748   | .163 |
| Mature personality | .711   | .360 |
| Culture            | .696   | .301 |
| Social sensitivity | .646   | .373 |
| Calmness           | .643   | .339 |
| Vigor              | .363   | .573 |
| Sociability        | .378   | .554 |
| Leadership         | .359   | .485 |
| Impulsiveness      | .057   | .382 |
| Self-confidence    | .317   | .371 |

Extraction Method: Principal Axis Factoring.  
Rotation Method: Varimax with Kaiser  
Normalization.

a. Rotation converged in 3 iterations.

### Factor Transformation Matrix

| Factor | 1     | 2    |
|--------|-------|------|
| 1      | .815  | .580 |
| 2      | -.580 | .815 |

Extraction Method: Principal  
Axis Factoring.  
Rotation Method: Varimax with  
Kaiser Normalization.

```
DESCRIPTIVES VARIABLES=FAC1_1 FAC2_1  
/SAVE  
/STATISTICS=MEAN STDDEV MIN MAX.
```

### Descriptives

[DataSet1] C:\Users\ridamian\Dropbox\PT\PT Paper\PT base year and follow up 1  
1-18-11\_Rodica2\_credible only\_1\_used for paper\_20.sav

#### Descriptive Statistics

|                     | N      | Minimum  | Maximum | Mean     | Std. Deviation |
|---------------------|--------|----------|---------|----------|----------------|
| Maturity Factor     | 346386 | -2.56324 | 2.59641 | .0000000 | .87119719      |
| Extraversion Factor | 346386 | -2.37870 | 3.23983 | .0000000 | .74529972      |
| Valid N (listwise)  | 346386 |          |         |          |                |

```
COMPUTE ZFAC1_1_sq= ZFAC1_1 * ZFAC1_1.  
EXECUTE.
```

```
COMPUTE ZFAC1_1XZBY_P801=ZFAC1_1 *ZBY_P801.  
EXECUTE.
```

```
COMPUTE ZFAC2_1_sq= ZFAC2_1 * ZFAC2_1.  
EXECUTE.
```

```
COMPUTE ZFAC2_1XZBY_P801=ZFAC2_1 *ZBY_P801.  
EXECUTE.
```

\*\*\*Maturity Factor and 3 outcomes\*\*\*

```
REGRESSION  
/MISSING LISTWISE  
/REGWGT=Y11_WTB  
/STATISTICS COEFF OUTS CI(95) R ANOVA BCOV CHANGE  
/CRITERIA=PIN(.05) POUT(.10)
```

```

/NOORIGIN
/DEPENDENT Y11_E001R
/METHOD=ENTER ZFAC1_1 ZBY_P801 ZFAC1_1XZBY_P801 ZFAC1_1_sq ZBY_P801_sq BY_S
EXefcode BY_RACEwefcode ZBY_TESTGRD
/METHOD=ENTER ZIQ_comp_vms ZIQ_comp_vms_sq ZIQ_comp_vmsXZBY_P801.

```

## Regression

[DataSet1] C:\Users\ridamian\Dropbox\PT\PT Paper\PT base year and follow up 1  
1-18-11\_Rodica2\_credible only\_1\_used for paper\_20.sav

**Variables Entered/Removed<sup>a,b</sup>**

| Model | Variables Entered                                                                                                                                                                                                                                                        | Variables Removed | Method |
|-------|--------------------------------------------------------------------------------------------------------------------------------------------------------------------------------------------------------------------------------------------------------------------------|-------------------|--------|
| 1     | Zscore:<br>Grade in<br>which student<br>was enrolled<br>at time of<br>testing,<br>BY_SEXefcod<br>e,<br>ZFAC1_1XZB<br>Y_P801,<br>BY_RACEwef<br>code,<br>ZFAC1_1_sq,<br>Zscore:<br>Socioeconomi<br>c index,<br>ZBY_P801_sq<br>, Zscore:<br>Maturity<br>Factor <sup>c</sup> | .                 | Enter  |
| 2     | ZIQ_comp_v<br>ms_sq,<br>Zscore<br>(IQ_comp_vm<br>s),<br>ZIQ_comp_v<br>msXZBY_P80<br>1 <sup>c</sup>                                                                                                                                                                       | .                 | Enter  |

a. Dependent Variable: Y11 Amount of Education (6 pt coding)

b. Weighted Least Squares Regression - Weighted by Eleven-year followup weight B

c. All requested variables entered.

**Model Summary**

| Model | R                 | R Square | Adjusted R Square | Std. Error of the Estimate | Change Statistics |          |     |
|-------|-------------------|----------|-------------------|----------------------------|-------------------|----------|-----|
|       |                   |          |                   |                            | R Square Change   | F Change | df1 |
| 1     | .501 <sup>a</sup> | .251     | .251              | 26.97927                   | .251              | 3126.320 | 8   |
| 2     | .623 <sup>b</sup> | .388     | .388              | 24.39495                   | .137              | 5551.342 | 3   |

**Model Summary**

| Model | Change Statistics |               |
|-------|-------------------|---------------|
|       | df2               | Sig. F Change |
| 1     | 74636             | .000          |
| 2     | 74633             | .000          |

- a. Predictors: (Constant), Zscore: Grade in which student was enrolled at time of testing, BY\_SEXefcode, ZFAC1\_1XZBY\_P801, BY\_RACEwefcode, ZFAC1\_1\_sq, Zscore: Socioeconomic index, ZBY\_P801\_sq, Zscore: Maturity Factor
- b. Predictors: (Constant), Zscore: Grade in which student was enrolled at time of testing, BY\_SEXefcode, ZFAC1\_1XZBY\_P801, BY\_RACEwefcode, ZFAC1\_1\_sq, Zscore: Socioeconomic index, ZBY\_P801\_sq, Zscore: Maturity Factor, ZIQ\_comp\_vms\_sq, Zscore(IQ\_comp\_vms), ZIQ\_comp\_vmsXZBY\_P801

**ANOVA<sup>a,b</sup>**

| Model |            | Sum of Squares | df    | Mean Square | F        | Sig.              |
|-------|------------|----------------|-------|-------------|----------|-------------------|
| 1     | Regression | 18204711.39    | 8     | 2275588.923 | 3126.320 | .000 <sup>c</sup> |
|       | Residual   | 54326130.62    | 74636 | 727.881     |          |                   |
|       | Total      | 72530842.01    | 74644 |             |          |                   |
| 2     | Regression | 28115744.88    | 11    | 2555976.808 | 4294.941 | .000 <sup>d</sup> |
|       | Residual   | 44415097.12    | 74633 | 595.113     |          |                   |
|       | Total      | 72530842.01    | 74644 |             |          |                   |

- a. Dependent Variable: Y11 Amount of Education (6 pt coding)
- b. Weighted Least Squares Regression - Weighted by Eleven-year followup weight B
- c. Predictors: (Constant), Zscore: Grade in which student was enrolled at time of testing, BY\_SEXefcode, ZFAC1\_1XZBY\_P801, BY\_RACEwefcode, ZFAC1\_1\_sq, Zscore: Socioeconomic index, ZBY\_P801\_sq, Zscore: Maturity Factor
- d. Predictors: (Constant), Zscore: Grade in which student was enrolled at time of testing, BY\_SEXefcode, ZFAC1\_1XZBY\_P801, BY\_RACEwefcode, ZFAC1\_1\_sq, Zscore: Socioeconomic index, ZBY\_P801\_sq, Zscore: Maturity Factor, ZIQ\_comp\_vms\_sq, Zscore(IQ\_comp\_vms), ZIQ\_comp\_vmsXZBY\_P801

**Coefficients<sup>a,b</sup>**

| Model |                                                                | Unstandardized Coefficients |            | Standardized Coefficients | t       | Sig. |
|-------|----------------------------------------------------------------|-----------------------------|------------|---------------------------|---------|------|
|       |                                                                | B                           | Std. Error | Beta                      |         |      |
| 1     | (Constant)                                                     | 2.794                       | .009       |                           | 327.321 | .000 |
|       | Zscore: Maturity Factor                                        | .155                        | .004       | .143                      | 42.581  | .000 |
|       | Zscore: Socioeconomic index                                    | .449                        | .004       | .402                      | 121.572 | .000 |
|       | ZFAC1_1XZBY_P801                                               | -.005                       | .004       | -.005                     | -1.479  | .139 |
|       | ZFAC1_1_sq                                                     | .007                        | .003       | .007                      | 2.288   | .022 |
|       | ZBY_P801_sq                                                    | .077                        | .003       | .091                      | 27.635  | .000 |
|       | BY_SEXefcode                                                   | -.244                       | .004       | -.223                     | -68.489 | .000 |
|       | BY_RACEwefcode                                                 | -.087                       | .007       | -.039                     | -11.865 | .000 |
|       | Zscore: Grade in which student was enrolled at time of testing | .024                        | .003       | .022                      | 6.916   | .000 |
| 2     | (Constant)                                                     | 2.925                       | .009       |                           | 338.567 | .000 |
|       | Zscore: Maturity Factor                                        | .107                        | .003       | .099                      | 32.315  | .000 |
|       | Zscore: Socioeconomic index                                    | .286                        | .004       | .256                      | 79.894  | .000 |
|       | ZFAC1_1XZBY_P801                                               | .005                        | .003       | .005                      | 1.593   | .111 |
|       | ZFAC1_1_sq                                                     | -.016                       | .003       | -.017                     | -5.803  | .000 |
|       | ZBY_P801_sq                                                    | .047                        | .003       | .055                      | 15.855  | .000 |
|       | BY_SEXefcode                                                   | -.168                       | .003       | -.153                     | -51.129 | .000 |
|       | BY_RACEwefcode                                                 | -.244                       | .007       | -.109                     | -35.140 | .000 |
|       | Zscore: Grade in which student was enrolled at time of testing | -.083                       | .003       | -.077                     | -25.446 | .000 |
|       | Zscore(IQ_comp_vms)                                            | .478                        | .004       | .429                      | 124.123 | .000 |
|       | ZIQ_comp_vms_sq                                                | .029                        | .003       | .031                      | 9.459   | .000 |
|       | ZIQ_comp_vmsXZBY_P801                                          | .037                        | .004       | .035                      | 9.035   | .000 |

**Coefficients<sup>a,b</sup>**

| Model |                                                                | 95.0% Confidence Interval for B |             |
|-------|----------------------------------------------------------------|---------------------------------|-------------|
|       |                                                                | Lower Bound                     | Upper Bound |
| 1     | (Constant)                                                     | 2.777                           | 2.811       |
|       | Zscore: Maturity Factor                                        | .148                            | .162        |
|       | Zscore: Socioeconomic index                                    | .442                            | .457        |
|       | ZFAC1_1XZBY_P801                                               | -.013                           | .002        |
|       | ZFAC1_1_sq                                                     | .001                            | .013        |
|       | ZBY_P801_sq                                                    | .071                            | .082        |
|       | BY_SEXefcode                                                   | -.251                           | -.237       |
|       | BY_RACEwefcode                                                 | -.102                           | -.073       |
|       | Zscore: Grade in which student was enrolled at time of testing | .017                            | .031        |
| 2     | (Constant)                                                     | 2.908                           | 2.942       |
|       | Zscore: Maturity Factor                                        | .101                            | .114        |
|       | Zscore: Socioeconomic index                                    | .279                            | .293        |
|       | ZFAC1_1XZBY_P801                                               | -.001                           | .012        |
|       | ZFAC1_1_sq                                                     | -.022                           | -.011       |
|       | ZBY_P801_sq                                                    | .041                            | .052        |
|       | BY_SEXefcode                                                   | -.174                           | -.161       |
|       | BY_RACEwefcode                                                 | -.258                           | -.231       |
|       | Zscore: Grade in which student was enrolled at time of testing | -.090                           | -.077       |
|       | Zscore(IQ_comp_vms)                                            | .470                            | .485        |
|       | ZIQ_comp_vms_sq                                                | .023                            | .035        |
|       | ZIQ_comp_vmsXZBY_P801                                          | .029                            | .046        |

a. Dependent Variable: Y11 Amount of Education (6 pt coding)

b. Weighted Least Squares Regression - Weighted by Eleven-year followup weight B



**Excluded Variables<sup>a,b</sup>**

| Model | Beta In               | t                 | Sig.    | Partial Correlation | Collinearity Statistics |      |
|-------|-----------------------|-------------------|---------|---------------------|-------------------------|------|
|       |                       |                   |         |                     | Tolerance               |      |
| 1     | Zscore(IQ_comp_vms)   | .437 <sup>c</sup> | 127.621 | .000                | .423                    | .702 |
|       | ZIQ_comp_vms_sq       | .090 <sup>c</sup> | 27.566  | .000                | .100                    | .931 |
|       | ZIQ_comp_vmsXZBY_P801 | .101 <sup>c</sup> | 26.910  | .000                | .098                    | .700 |

a. Dependent Variable: Y11 Amount of Education (6 pt coding)

b. Weighted Least Squares Regression - Weighted by Eleven-year followup weight B

c. Predictors in the Model: (Constant), Zscore: Grade in which student was enrolled at time of testing, BY\_SEXefcode, ZFAC1\_1XZBY\_P801, BY\_RACEwefcode, ZFAC1\_1\_sq, Zscore: Socioeconomic index, ZBY\_P801\_sq, Zscore: Maturity Factor

**Coefficient Correlations<sup>a,b</sup>**

| Model |              | Zscore: Grade in which student was enrolled at time of testing | BY_SEXefcode | ZFAC1_1XZBY_P801 |             |
|-------|--------------|----------------------------------------------------------------|--------------|------------------|-------------|
| 1     | Correlations | Zscore: Grade in which student was enrolled at time of testing | 1.000        | .027             | .025        |
|       |              | BY_SEXefcode                                                   | .027         | 1.000            | .012        |
|       |              | ZFAC1_1XZBY_P801                                               | .025         | .012             | 1.000       |
|       |              | BY_RACEwefcode                                                 | -.039        | .032             | -.062       |
|       |              | ZFAC1_1_sq                                                     | -.030        | .008             | -.166       |
|       |              | Zscore: Socioeconomic index                                    | -.047        | .053             | .004        |
|       |              | ZBY_P801_sq                                                    | .041         | .026             | -.205       |
|       |              | Zscore: Maturity Factor                                        | -.146        | -.227            | -.076       |
|       | Covariances  | Zscore: Grade in which student was enrolled at time of testing | 1.224E-005   | 3.411E-007       | 3.220E-007  |
|       |              | BY_SEXefcode                                                   | 3.411E-007   | 1.271E-005       | 1.504E-007  |
|       |              | ZFAC1_1XZBY_P801                                               | 3.220E-007   | 1.504E-007       | 1.343E-005  |
|       |              | BY_RACEwefcode                                                 | -1.009E-006  | 8.354E-007       | -1.676E-006 |
|       |              | ZFAC1_1_sq                                                     | -3.231E-007  | 8.701E-008       | -1.861E-006 |
|       |              | Zscore: Socioeconomic index                                    | -6.032E-007  | 7.031E-007       | 5.318E-008  |
|       |              | ZBY_P801_sq                                                    | 3.954E-007   | 2.582E-007       | -2.080E-006 |
|       |              | Zscore: Maturity Factor                                        | -1.861E-006  | -2.946E-006      | -1.017E-006 |

**Coefficient Correlations<sup>a,b</sup>**

| Model                   |              |                                                                | BY_RACEwef<br>code | ZFAC1_1_sq  | Zscore:<br>Socioeconomi<br>c index |
|-------------------------|--------------|----------------------------------------------------------------|--------------------|-------------|------------------------------------|
| 1                       | Correlations | Zscore: Grade in which student was enrolled at time of testing | -.039              | -.030       | -.047                              |
|                         |              | BY_SEXefcode                                                   | .032               | .008        | .053                               |
|                         |              | ZFAC1_1XZBY_P801                                               | -.062              | -.166       | .004                               |
|                         |              | BY_RACEwefcode                                                 | 1.000              | -.023       | -.219                              |
|                         |              | ZFAC1_1_sq                                                     | -.023              | 1.000       | -.015                              |
|                         |              | Zscore: Socioeconomic index                                    | -.219              | -.015       | 1.000                              |
|                         |              | ZBY_P801_sq                                                    | .148               | .017        | -.042                              |
|                         |              | Zscore: Maturity Factor                                        | .047               | -.073       | -.173                              |
|                         | Covariances  | Zscore: Grade in which student was enrolled at time of testing | -1.009E-006        | -3.231E-007 | -6.032E-007                        |
|                         |              | BY_SEXefcode                                                   | 8.354E-007         | 8.701E-008  | 7.031E-007                         |
|                         |              | ZFAC1_1XZBY_P801                                               | -1.676E-006        | -1.861E-006 | 5.318E-008                         |
|                         |              | BY_RACEwefcode                                                 | 5.426E-005         | -5.133E-007 | -5.975E-006                        |
|                         |              | ZFAC1_1_sq                                                     | -5.133E-007        | 9.371E-006  | -1.691E-007                        |
|                         |              | Zscore: Socioeconomic index                                    | -5.975E-006        | -1.691E-007 | 1.366E-005                         |
|                         |              | ZBY_P801_sq                                                    | 3.020E-006         | 1.472E-007  | -4.339E-007                        |
| Zscore: Maturity Factor | 1.263E-006   | -8.177E-007                                                    | -2.336E-006        |             |                                    |

**Coefficient Correlations<sup>a,b</sup>**

| Model                   |              | ZBY_P801_sq                                                    | Zscore:<br>Maturity<br>Factor | ZIQ_comp_v<br>ms_sq |  |
|-------------------------|--------------|----------------------------------------------------------------|-------------------------------|---------------------|--|
| 1                       | Correlations | Zscore: Grade in which student was enrolled at time of testing | .041                          | -.146               |  |
|                         |              | BY_SEXefcode                                                   | .026                          | -.227               |  |
|                         |              | ZFAC1_1XZBY_P801                                               | -.205                         | -.076               |  |
|                         |              | BY_RACEwefcode                                                 | .148                          | .047                |  |
|                         |              | ZFAC1_1_sq                                                     | .017                          | -.073               |  |
|                         |              | Zscore: Socioeconomic index                                    | -.042                         | -.173               |  |
|                         |              | ZBY_P801_sq                                                    | 1.000                         | -.015               |  |
|                         |              | Zscore: Maturity Factor                                        | -.015                         | 1.000               |  |
|                         | Covariances  | Zscore: Grade in which student was enrolled at time of testing | 3.954E-007                    | -1.861E-006         |  |
|                         |              | BY_SEXefcode                                                   | 2.582E-007                    | -2.946E-006         |  |
|                         |              | ZFAC1_1XZBY_P801                                               | -2.080E-006                   | -1.017E-006         |  |
|                         |              | BY_RACEwefcode                                                 | 3.020E-006                    | 1.263E-006          |  |
|                         |              | ZFAC1_1_sq                                                     | 1.472E-007                    | -8.177E-007         |  |
|                         |              | Zscore: Socioeconomic index                                    | -4.339E-007                   | -2.336E-006         |  |
|                         |              | ZBY_P801_sq                                                    | 7.687E-006                    | -1.501E-007         |  |
| Zscore: Maturity Factor | -1.501E-007  | 1.328E-005                                                     |                               |                     |  |



**Coefficient Correlations<sup>a,b</sup>**

| Model                       |              | Zscore:<br>Grade in<br>which student<br>was enrolled<br>at time of<br>testing | BY_SEXefcode                                                   | ZFAC1_1XZBY<br>Y_P801 |             |            |
|-----------------------------|--------------|-------------------------------------------------------------------------------|----------------------------------------------------------------|-----------------------|-------------|------------|
| 2                           | Correlations | Zscore: Grade in which student was enrolled at time of testing                | 1.000                                                          | -.022                 | .016        |            |
|                             |              | BY_SEXefcode                                                                  | -.022                                                          | 1.000                 | .018        |            |
|                             |              | ZFAC1_1XZBY_P801                                                              | .016                                                           | .018                  | 1.000       |            |
|                             |              | BY_RACEwefcode                                                                | .008                                                           | .000                  | -.081       |            |
|                             |              | ZFAC1_1_sq                                                                    | -.013                                                          | -.004                 | -.167       |            |
|                             |              | Zscore: Socioeconomic index                                                   | .050                                                           | -.017                 | -.011       |            |
|                             |              | ZBY_P801_sq                                                                   | .033                                                           | .031                  | -.137       |            |
|                             |              | Zscore: Maturity Factor                                                       | -.111                                                          | -.242                 | -.083       |            |
|                             |              | ZIQ_comp_vms_sq                                                               | -.050                                                          | .055                  | -.026       |            |
|                             |              | Zscore(IQ_comp_vms)                                                           | -.248                                                          | .175                  | .048        |            |
|                             |              | ZIQ_comp_vmsXZBY_P801                                                         | .026                                                           | -.038                 | -.062       |            |
|                             |              | Covariances                                                                   | Zscore: Grade in which student was enrolled at time of testing | 1.073E-005            | -2.412E-007 | 1.731E-007 |
|                             |              |                                                                               |                                                                | BY_SEXefcode          | -2.412E-007 | 1.078E-005 |
| ZFAC1_1XZBY_P801            | 1.731E-007   |                                                                               |                                                                | 1.926E-007            | 1.108E-005  |            |
| BY_RACEwefcode              | 1.797E-007   |                                                                               |                                                                | 4.372E-010            | -1.885E-006 |            |
| ZFAC1_1_sq                  | -1.147E-007  |                                                                               |                                                                | -3.463E-008           | -1.544E-006 |            |
| Zscore: Socioeconomic index | 5.862E-007   |                                                                               |                                                                | -2.009E-007           | -1.252E-007 |            |
| ZBY_P801_sq                 | 3.218E-007   |                                                                               |                                                                | 2.943E-007            | -1.339E-006 |            |
| Zscore: Maturity Factor     | -1.206E-006  |                                                                               |                                                                | -2.633E-006           | -9.137E-007 |            |
| ZIQ_comp_vms_sq             | -5.116E-007  |                                                                               |                                                                | 5.562E-007            | -2.722E-007 |            |
| Zscore(IQ_comp_vms)         | -3.120E-006  |                                                                               |                                                                | 2.215E-006            | 6.127E-007  |            |
| ZIQ_comp_vmsXZBY_P801       | 3.502E-007   | -5.136E-007                                                                   | -8.601E-007                                                    |                       |             |            |

**Coefficient Correlations<sup>a,b</sup>**

| Model                       |              |                                                                | BY_RACEwef<br>code                                             | ZFAC1_1_sq  | Zscore:<br>Socioeconomi<br>c index |             |
|-----------------------------|--------------|----------------------------------------------------------------|----------------------------------------------------------------|-------------|------------------------------------|-------------|
| 2                           | Correlations | Zscore: Grade in which student was enrolled at time of testing | .008                                                           | -.013       | .050                               |             |
|                             |              | BY_SEXefcode                                                   | .000                                                           | -.004       | -.017                              |             |
|                             |              | ZFAC1_1XZBY_P801                                               | -.081                                                          | -.167       | -.011                              |             |
|                             |              | BY_RACEwefcode                                                 | 1.000                                                          | -.008       | -.125                              |             |
|                             |              | ZFAC1_1_sq                                                     | -.008                                                          | 1.000       | .009                               |             |
|                             |              | Zscore: Socioeconomic index                                    | -.125                                                          | .009        | 1.000                              |             |
|                             |              | ZBY_P801_sq                                                    | .080                                                           | .017        | -.037                              |             |
|                             |              | Zscore: Maturity Factor                                        | .076                                                           | -.065       | -.118                              |             |
|                             |              | ZIQ_comp_vms_sq                                                | .157                                                           | .002        | -.027                              |             |
|                             |              | Zscore(IQ_comp_vms)                                            | -.229                                                          | -.065       | -.354                              |             |
|                             |              | ZIQ_comp_vmsXZBY_P801                                          | .050                                                           | -.001       | .032                               |             |
|                             |              | Covariances                                                    | Zscore: Grade in which student was enrolled at time of testing | 1.797E-007  | -1.147E-007                        | 5.862E-007  |
|                             |              |                                                                | BY_SEXefcode                                                   | 4.372E-010  | -3.463E-008                        | -2.009E-007 |
| ZFAC1_1XZBY_P801            | -1.885E-006  |                                                                | -1.544E-006                                                    | -1.252E-007 |                                    |             |
| BY_RACEwefcode              | 4.837E-005   |                                                                | -1.590E-007                                                    | -3.112E-006 |                                    |             |
| ZFAC1_1_sq                  | -1.590E-007  |                                                                | 7.694E-006                                                     | 9.271E-008  |                                    |             |
| Zscore: Socioeconomic index | -3.112E-006  |                                                                | 9.271E-008                                                     | 1.282E-005  |                                    |             |
| ZBY_P801_sq                 | 1.636E-006   |                                                                | 1.395E-007                                                     | -3.900E-007 |                                    |             |
| Zscore: Maturity Factor     | 1.751E-006   |                                                                | -5.975E-007                                                    | -1.408E-006 |                                    |             |
| ZIQ_comp_vms_sq             | 3.373E-006   |                                                                | 1.571E-008                                                     | -3.020E-007 |                                    |             |
| Zscore(IQ_comp_vms)         | -6.119E-006  |                                                                | -6.908E-007                                                    | -4.880E-006 |                                    |             |
| ZIQ_comp_vmsXZBY_P801       | 1.433E-006   | -1.068E-008                                                    | 4.778E-007                                                     |             |                                    |             |

**Coefficient Correlations<sup>a,b</sup>**

| Model                       |              | ZBY_P801_sq                                                    | Zscore:<br>Maturity<br>Factor                                  | ZIQ_comp_v<br>ms_sq |             |             |
|-----------------------------|--------------|----------------------------------------------------------------|----------------------------------------------------------------|---------------------|-------------|-------------|
| 2                           | Correlations | Zscore: Grade in which student was enrolled at time of testing | .033                                                           | -.111               | -.050       |             |
|                             |              | BY_SEXefcode                                                   | .031                                                           | -.242               | .055        |             |
|                             |              | ZFAC1_1XZBY_P801                                               | -.137                                                          | -.083               | -.026       |             |
|                             |              | BY_RACEwefcode                                                 | .080                                                           | .076                | .157        |             |
|                             |              | ZFAC1_1_sq                                                     | .017                                                           | -.065               | .002        |             |
|                             |              | Zscore: Socioeconomic index                                    | -.037                                                          | -.118               | -.027       |             |
|                             |              | ZBY_P801_sq                                                    | 1.000                                                          | -.023               | .118        |             |
|                             |              | Zscore: Maturity Factor                                        | -.023                                                          | 1.000               | .019        |             |
|                             |              | ZIQ_comp_vms_sq                                                | .118                                                           | .019                | 1.000       |             |
|                             |              | Zscore(IQ_comp_vms)                                            | .019                                                           | -.122               | -.078       |             |
|                             |              | ZIQ_comp_vmsXZBY_P801                                          | -.506                                                          | .020                | -.433       |             |
|                             |              | Covariances                                                    | Zscore: Grade in which student was enrolled at time of testing | 3.218E-007          | -1.206E-006 | -5.116E-007 |
|                             |              |                                                                |                                                                | BY_SEXefcode        | 2.943E-007  | -2.633E-006 |
| ZFAC1_1XZBY_P801            | -1.339E-006  |                                                                |                                                                | -9.137E-007         | -2.722E-007 |             |
| BY_RACEwefcode              | 1.636E-006   |                                                                |                                                                | 1.751E-006          | 3.373E-006  |             |
| ZFAC1_1_sq                  | 1.395E-007   |                                                                |                                                                | -5.975E-007         | 1.571E-008  |             |
| Zscore: Socioeconomic index | -3.900E-007  |                                                                |                                                                | -1.408E-006         | -3.020E-007 |             |
| ZBY_P801_sq                 | 8.603E-006   |                                                                |                                                                | -2.202E-007         | 1.070E-006  |             |
| Zscore: Maturity Factor     | -2.202E-007  |                                                                |                                                                | 1.103E-005          | 1.994E-007  |             |
| ZIQ_comp_vms_sq             | 1.070E-006   |                                                                |                                                                | 1.994E-007          | 9.571E-006  |             |
| Zscore(IQ_comp_vms)         | 2.160E-007   |                                                                |                                                                | -1.558E-006         | -9.329E-007 |             |
| ZIQ_comp_vmsXZBY_P801       | -6.154E-006  |                                                                |                                                                | 2.785E-007          | -5.553E-006 |             |

**Coefficient Correlations<sup>a,b</sup>**

| Model                       |              | Zscore<br>(IQ_comp_vms)                                        | ZIQ_comp_vmsXZBY_P801                                          |             |             |
|-----------------------------|--------------|----------------------------------------------------------------|----------------------------------------------------------------|-------------|-------------|
| 2                           | Correlations | Zscore: Grade in which student was enrolled at time of testing | .248                                                           |             |             |
|                             |              | BY_SEXefcode                                                   | .175                                                           |             |             |
|                             |              | ZFAC1_1XZBY_P801                                               | .048                                                           |             |             |
|                             |              | BY_RACEwefcode                                                 | -.229                                                          |             |             |
|                             |              | ZFAC1_1_sq                                                     | -.065                                                          |             |             |
|                             |              | Zscore: Socioeconomic index                                    | -.354                                                          |             |             |
|                             |              | ZBY_P801_sq                                                    | .019                                                           |             |             |
|                             |              | Zscore: Maturity Factor                                        | -.122                                                          |             |             |
|                             |              | ZIQ_comp_vms_sq                                                | -.078                                                          |             |             |
|                             |              | Zscore(IQ_comp_vms)                                            | 1.000                                                          |             |             |
|                             |              | ZIQ_comp_vmsXZBY_P801                                          | -.073                                                          |             |             |
|                             |              | Covariances                                                    | Zscore: Grade in which student was enrolled at time of testing | -3.120E-006 | 3.502E-007  |
|                             |              |                                                                | BY_SEXefcode                                                   | 2.215E-006  | -5.136E-007 |
| ZFAC1_1XZBY_P801            | 6.127E-007   |                                                                | -8.601E-007                                                    |             |             |
| BY_RACEwefcode              | -6.119E-006  |                                                                | 1.433E-006                                                     |             |             |
| ZFAC1_1_sq                  | -6.908E-007  |                                                                | -1.068E-008                                                    |             |             |
| Zscore: Socioeconomic index | -4.880E-006  |                                                                | 4.778E-007                                                     |             |             |
| ZBY_P801_sq                 | 2.160E-007   |                                                                | -6.154E-006                                                    |             |             |
| Zscore: Maturity Factor     | -1.558E-006  |                                                                | 2.785E-007                                                     |             |             |
| ZIQ_comp_vms_sq             | -9.329E-007  |                                                                | -5.553E-006                                                    |             |             |
| Zscore(IQ_comp_vms)         | 1.481E-005   |                                                                | -1.159E-006                                                    |             |             |
| ZIQ_comp_vmsXZBY_P801       | -1.159E-006  |                                                                | 1.720E-005                                                     |             |             |

a. Dependent Variable: Y11 Amount of Education (6 pt coding)

b. Weighted Least Squares Regression - Weighted by Eleven-year followup weight B

REGRESSION

/MISSING LISTWISE

/REGWGT=Y11\_WTB

/STATISTICS COEFF OUTS CI(95) R ANOVA BCOV CHANGE

/CRITERIA=PIN(.05) POUT(.10)



```

/NOORIGIN
/DEPENDENT ln_Y11_O221
/METHOD=ENTER ZFAC1_1 ZBY_P801 ZFAC1_1XZBY_P801 ZFAC1_1_sq ZBY_P801_sq BY_S
EXefcode BY_RACEwefcode ZBY_TESTGRD
/METHOD=ENTER ZIQ_comp_vms ZIQ_comp_vms_sq ZIQ_comp_vmsXZBY_P801.

```

## Regression

[DataSet1] C:\Users\ridamian\Dropbox\PT\PT Paper\PT base year and follow up 1  
1-18-11\_Rodica2\_credible only\_1\_used for paper\_20.sav

**Variables Entered/Removed<sup>a,b</sup>**

| Model | Variables Entered                                                                                                                                                                                                                                                     | Variables Removed | Method |
|-------|-----------------------------------------------------------------------------------------------------------------------------------------------------------------------------------------------------------------------------------------------------------------------|-------------------|--------|
| 1     | Zscore:<br>Grade in<br>which student<br>was enrolled<br>at time of<br>testing,<br>ZFAC1_1XZB<br>Y_P801,<br>BY_SEXefcod<br>e, Zscore:<br>Socioeconomi<br>c index,<br>ZFAC1_1_sq,<br>ZBY_P801_sq<br>,<br>BY_RACEwef<br>code, Zscore:<br>Maturity<br>Factor <sup>c</sup> |                   | Enter  |
| 2     | ZIQ_comp_v<br>ms_sq,<br>Zscore<br>(IQ_comp_vm<br>s),<br>ZIQ_comp_v<br>msXZBY_P80<br>1 <sup>c</sup>                                                                                                                                                                    |                   | Enter  |

- a. Dependent Variable: Estimated annual earnings on current job (natural logarithm)
- b. Weighted Least Squares Regression - Weighted by Eleven-year followup weight B
- c. All requested variables entered.

**Model Summary**

| Model | R                 | R Square | Adjusted R Square | Std. Error of the Estimate | Change Statistics |          |     |
|-------|-------------------|----------|-------------------|----------------------------|-------------------|----------|-----|
|       |                   |          |                   |                            | R Square Change   | F Change | df1 |
| 1     | .551 <sup>a</sup> | .303     | .303              | 14.07113                   | .303              | 2913.131 | 8   |
| 2     | .555 <sup>b</sup> | .308     | .308              | 14.02418                   | .005              | 120.610  | 3   |

**Model Summary**

| Model | Change Statistics |               |
|-------|-------------------|---------------|
|       | df2               | Sig. F Change |
| 1     | 53507             | .000          |
| 2     | 53504             | .000          |

- a. Predictors: (Constant), Zscore: Grade in which student was enrolled at time of testing, ZFAC1\_1XZBY\_P801, BY\_SEXefcode, Zscore: Socioeconomic index, ZFAC1\_1\_sq, ZBY\_P801\_sq, BY\_RACEwefcode, Zscore: Maturity Factor
- b. Predictors: (Constant), Zscore: Grade in which student was enrolled at time of testing, ZFAC1\_1XZBY\_P801, BY\_SEXefcode, Zscore: Socioeconomic index, ZFAC1\_1\_sq, ZBY\_P801\_sq, BY\_RACEwefcode, Zscore: Maturity Factor, ZIQ\_comp\_vms\_sq, Zscore(IQ\_comp\_vms), ZIQ\_comp\_vmsXZBY\_P801

**ANOVA<sup>a,b</sup>**

| Model |            | Sum of Squares | df    | Mean Square | F        | Sig.              |
|-------|------------|----------------|-------|-------------|----------|-------------------|
| 1     | Regression | 4614322.017    | 8     | 576790.252  | 2913.131 | .000 <sup>c</sup> |
|       | Residual   | 10594208.03    | 53507 | 197.997     |          |                   |
|       | Total      | 15208530.04    | 53515 |             |          |                   |
| 2     | Regression | 4685486.147    | 11    | 425953.286  | 2165.743 | .000 <sup>d</sup> |
|       | Residual   | 10523043.90    | 53504 | 196.678     |          |                   |
|       | Total      | 15208530.04    | 53515 |             |          |                   |

- a. Dependent Variable: Estimated annual earnings on current job (natural logarithm)
- b. Weighted Least Squares Regression - Weighted by Eleven-year followup weight B
- c. Predictors: (Constant), Zscore: Grade in which student was enrolled at time of testing, ZFAC1\_1XZBY\_P801, BY\_SEXefcode, Zscore: Socioeconomic index, ZFAC1\_1\_sq, ZBY\_P801\_sq, BY\_RACEwefcode, Zscore: Maturity Factor
- d. Predictors: (Constant), Zscore: Grade in which student was enrolled at time of testing, ZFAC1\_1XZBY\_P801, BY\_SEXefcode, Zscore: Socioeconomic index, ZFAC1\_1\_sq, ZBY\_P801\_sq, BY\_RACEwefcode, Zscore: Maturity Factor, ZIQ\_comp\_vms\_sq, Zscore(IQ\_comp\_vms), ZIQ\_comp\_vmsXZBY\_P801

**Coefficients<sup>a,b</sup>**

| Model |                                                                | Unstandardized Coefficients |            | Standardized Coefficients | t        | Sig. |
|-------|----------------------------------------------------------------|-----------------------------|------------|---------------------------|----------|------|
|       |                                                                | B                           | Std. Error | Beta                      |          |      |
| 1     | (Constant)                                                     | 9.010                       | .005       |                           | 1760.625 | .000 |
|       | Zscore: Maturity Factor                                        | .033                        | .002       | .055                      | 14.435   | .000 |
|       | Zscore: Socioeconomic index                                    | .071                        | .002       | .118                      | 31.066   | .000 |
|       | ZFAC1_1XZBY_P801                                               | -.005                       | .002       | -.008                     | -2.086   | .037 |
|       | ZFAC1_1_sq                                                     | -.001                       | .002       | -.003                     | -.727    | .467 |
|       | ZBY_P801_sq                                                    | .001                        | .002       | .001                      | .367     | .714 |
|       | BY_SEXefcode                                                   | -.337                       | .002       | -.538                     | -144.432 | .000 |
|       | BY_RACEwefcode                                                 | -.018                       | .004       | -.016                     | -4.102   | .000 |
|       | Zscore: Grade in which student was enrolled at time of testing | -.073                       | .002       | -.121                     | -33.025  | .000 |
| 2     | (Constant)                                                     | 9.024                       | .006       |                           | 1579.226 | .000 |
|       | Zscore: Maturity Factor                                        | .028                        | .002       | .046                      | 12.006   | .000 |
|       | Zscore: Socioeconomic index                                    | .056                        | .002       | .093                      | 22.878   | .000 |
|       | ZFAC1_1XZBY_P801                                               | -.003                       | .002       | -.004                     | -1.171   | .242 |
|       | ZFAC1_1_sq                                                     | -.004                       | .002       | -.007                     | -1.940   | .052 |
|       | ZBY_P801_sq                                                    | .005                        | .002       | .011                      | 2.459    | .014 |
|       | BY_SEXefcode                                                   | -.330                       | .002       | -.528                     | -140.669 | .000 |
|       | BY_RACEwefcode                                                 | -.037                       | .005       | -.032                     | -8.138   | .000 |
|       | Zscore: Grade in which student was enrolled at time of testing | -.084                       | .002       | -.139                     | -36.748  | .000 |
|       | Zscore(IQ_comp_vms)                                            | .048                        | .003       | .080                      | 18.185   | .000 |
|       | ZIQ_comp_vms_sq                                                | .003                        | .002       | .006                      | 1.445    | .148 |
|       | ZIQ_comp_vmsXZBY_P801                                          | -.014                       | .003       | -.024                     | -5.056   | .000 |

**Coefficients<sup>a,b</sup>**

| Model |                                                                | 95.0% Confidence Interval for B |             |
|-------|----------------------------------------------------------------|---------------------------------|-------------|
|       |                                                                | Lower Bound                     | Upper Bound |
| 1     | (Constant)                                                     | 9.000                           | 9.020       |
|       | Zscore: Maturity Factor                                        | .028                            | .037        |
|       | Zscore: Socioeconomic index                                    | .067                            | .076        |
|       | ZFAC1_1XZBY_P801                                               | -.009                           | .000        |
|       | ZFAC1_1_sq                                                     | -.005                           | .002        |
|       | ZBY_P801_sq                                                    | -.003                           | .004        |
|       | BY_SEXefcode                                                   | -.341                           | -.332       |
|       | BY_RACEwefcode                                                 | -.027                           | -.009       |
|       | Zscore: Grade in which student was enrolled at time of testing | -.077                           | -.069       |
| 2     | (Constant)                                                     | 9.013                           | 9.036       |
|       | Zscore: Maturity Factor                                        | .023                            | .032        |
|       | Zscore: Socioeconomic index                                    | .051                            | .061        |
|       | ZFAC1_1XZBY_P801                                               | -.007                           | .002        |
|       | ZFAC1_1_sq                                                     | -.007                           | .000        |
|       | ZBY_P801_sq                                                    | .001                            | .009        |
|       | BY_SEXefcode                                                   | -.335                           | -.326       |
|       | BY_RACEwefcode                                                 | -.046                           | -.028       |
|       | Zscore: Grade in which student was enrolled at time of testing | -.089                           | -.080       |
|       | Zscore(IQ_comp_vms)                                            | .043                            | .053        |
|       | ZIQ_comp_vms_sq                                                | -.001                           | .007        |
|       | ZIQ_comp_vmsXZBY_P801                                          | -.020                           | -.009       |

a. Dependent Variable: Estimated annual earnings on current job (natural logarithm)

b. Weighted Least Squares Regression - Weighted by Eleven-year followup weight B

**Excluded Variables<sup>a,b</sup>**

| Model | Beta In               | t                  | Sig.   | Partial Correlation | Collinearity Statistics |      |
|-------|-----------------------|--------------------|--------|---------------------|-------------------------|------|
|       |                       |                    |        |                     | Tolerance               |      |
| 1     | Zscore(IQ_comp_vms)   | .079 <sup>c</sup>  | 18.310 | .000                | .079                    | .698 |
|       | ZIQ_comp_vms_sq       | .009 <sup>c</sup>  | 2.524  | .012                | .011                    | .927 |
|       | ZIQ_comp_vmsXZBY_P801 | -.014 <sup>c</sup> | -3.258 | .001                | -.014                   | .697 |

- a. Dependent Variable: Estimated annual earnings on current job (natural logarithm)
- b. Weighted Least Squares Regression - Weighted by Eleven-year followup weight B
- c. Predictors in the Model: (Constant), Zscore: Grade in which student was enrolled at time of testing, ZFAC1\_1XZBY\_P801, BY\_SEXefcode, Zscore: Socioeconomic index, ZFAC1\_1\_sq, ZBY\_P801\_sq, BY\_RACEwefcode, Zscore: Maturity Factor

**Coefficient Correlations<sup>a,b</sup>**

| Model |                         | Zscore: Grade in which student was enrolled at time of testing | ZFAC1_1XZBY_P801 | BY_SEXefcode |             |
|-------|-------------------------|----------------------------------------------------------------|------------------|--------------|-------------|
| 1     | Correlations            | Zscore: Grade in which student was enrolled at time of testing | 1.000            | .025         | .050        |
|       |                         | ZFAC1_1XZBY_P801                                               | .025             | 1.000        | .018        |
|       |                         | BY_SEXefcode                                                   | .050             | .018         | 1.000       |
|       |                         | Zscore: Socioeconomic index                                    | -.047            | .055         | .029        |
|       |                         | ZFAC1_1_sq                                                     | -.022            | -.170        | -.005       |
|       |                         | ZBY_P801_sq                                                    | .048             | -.220        | .012        |
|       |                         | BY_RACEwefcode                                                 | -.034            | -.071        | .110        |
|       |                         | Zscore: Maturity Factor                                        | -.143            | -.101        | -.212       |
|       | Covariances             | Zscore: Grade in which student was enrolled at time of testing | 4.884E-006       | 1.271E-007   | 2.559E-007  |
|       |                         | ZFAC1_1XZBY_P801                                               | 1.271E-007       | 5.262E-006   | 9.680E-008  |
|       |                         | BY_SEXefcode                                                   | 2.559E-007       | 9.680E-008   | 5.430E-006  |
|       |                         | Zscore: Socioeconomic index                                    | -2.376E-007      | 2.926E-007   | 1.555E-007  |
|       |                         | ZFAC1_1_sq                                                     | -9.312E-008      | -7.452E-007  | -2.030E-008 |
|       |                         | ZBY_P801_sq                                                    | 1.825E-007       | -8.656E-007  | 4.805E-008  |
|       | BY_RACEwefcode          | -3.268E-007                                                    | -7.180E-007      | 1.126E-006   |             |
|       | Zscore: Maturity Factor | -7.215E-007                                                    | -5.287E-007      | -1.127E-006  |             |

**Coefficient Correlations<sup>a,b</sup>**

| Model                   |              | Zscore:<br>Socioeconomic<br>index                              | ZFAC1_1_sq  | ZBY_P801_sq |             |
|-------------------------|--------------|----------------------------------------------------------------|-------------|-------------|-------------|
| 1                       | Correlations | Zscore: Grade in which student was enrolled at time of testing | -.047       | -.022       | .048        |
|                         |              | ZFAC1_1XZBY_P801                                               | .055        | -.170       | -.220       |
|                         |              | BY_SEXefcode                                                   | .029        | -.005       | .012        |
|                         |              | Zscore: Socioeconomic index                                    | 1.000       | -.027       | -.048       |
|                         |              | ZFAC1_1_sq                                                     | -.027       | 1.000       | .018        |
|                         |              | ZBY_P801_sq                                                    | -.048       | .018        | 1.000       |
|                         |              | BY_RACEwefcode                                                 | -.239       | -.020       | .153        |
|                         |              | Zscore: Maturity Factor                                        | -.175       | .008        | -.017       |
|                         | Covariances  | Zscore: Grade in which student was enrolled at time of testing | -2.376E-007 | -9.312E-008 | 1.825E-007  |
|                         |              | ZFAC1_1XZBY_P801                                               | 2.926E-007  | -7.452E-007 | -8.656E-007 |
|                         |              | BY_SEXefcode                                                   | 1.555E-007  | -2.030E-008 | 4.805E-008  |
|                         |              | Zscore: Socioeconomic index                                    | 5.292E-006  | -1.198E-007 | -1.889E-007 |
|                         |              | ZFAC1_1_sq                                                     | -1.198E-007 | 3.674E-006  | 5.815E-008  |
|                         |              | ZBY_P801_sq                                                    | -1.889E-007 | 5.815E-008  | 2.940E-006  |
|                         |              | BY_RACEwefcode                                                 | -2.421E-006 | -1.727E-007 | 1.153E-006  |
| Zscore: Maturity Factor | -9.193E-007  | 3.558E-008                                                     | -6.549E-008 |             |             |

**Coefficient Correlations<sup>a,b</sup>**

| Model |                         |                                                                | BY_RACEwef<br>code | Zscore:<br>Maturity<br>Factor | ZIQ_comp_v<br>ms_sq |
|-------|-------------------------|----------------------------------------------------------------|--------------------|-------------------------------|---------------------|
| 1     | Correlations            | Zscore: Grade in which student was enrolled at time of testing | -.034              | -.143                         |                     |
|       |                         | ZFAC1_1XZBY_P801                                               | -.071              | -.101                         |                     |
|       |                         | BY_SEXefcode                                                   | .110               | -.212                         |                     |
|       |                         | Zscore: Socioeconomic index                                    | -.239              | -.175                         |                     |
|       |                         | ZFAC1_1_sq                                                     | -.020              | .008                          |                     |
|       |                         | ZBY_P801_sq                                                    | .153               | -.017                         |                     |
|       |                         | BY_RACEwefcode                                                 | 1.000              | .049                          |                     |
|       |                         | Zscore: Maturity Factor                                        | .049               | 1.000                         |                     |
|       | Covariances             | Zscore: Grade in which student was enrolled at time of testing | -3.268E-007        | -7.215E-007                   |                     |
|       |                         | ZFAC1_1XZBY_P801                                               | -7.180E-007        | -5.287E-007                   |                     |
|       |                         | BY_SEXefcode                                                   | 1.126E-006         | -1.127E-006                   |                     |
|       |                         | Zscore: Socioeconomic index                                    | -2.421E-006        | -9.193E-007                   |                     |
|       |                         | ZFAC1_1_sq                                                     | -1.727E-007        | 3.558E-008                    |                     |
|       |                         | ZBY_P801_sq                                                    | 1.153E-006         | -6.549E-008                   |                     |
|       | BY_RACEwefcode          | 1.943E-005                                                     | 4.974E-007         |                               |                     |
|       | Zscore: Maturity Factor | 4.974E-007                                                     | 5.214E-006         |                               |                     |

**Coefficient Correlations<sup>a,b</sup>**

| Model                                                                                                                                                                                                                                | Zscore<br>(IQ_comp_vms) | ZIQ_comp_vmsXZBY_P801 |
|--------------------------------------------------------------------------------------------------------------------------------------------------------------------------------------------------------------------------------------|-------------------------|-----------------------|
| 1      Correlations      Zscore: Grade in which student was enrolled at time of testing<br>ZFAC1_1XZBY_P801<br>BY_SEXefcode<br>Zscore: Socioeconomic index<br>ZFAC1_1_sq<br>ZBY_P801_sq<br>BY_RACEwefcode<br>Zscore: Maturity Factor |                         |                       |
| Covariances      Zscore: Grade in which student was enrolled at time of testing<br>ZFAC1_1XZBY_P801<br>BY_SEXefcode<br>Zscore: Socioeconomic index<br>ZFAC1_1_sq<br>ZBY_P801_sq<br>BY_RACEwefcode<br>Zscore: Maturity Factor         |                         |                       |



**Coefficient Correlations<sup>a,b</sup>**

| Model                       |              | Zscore:<br>Grade in<br>which student<br>was enrolled<br>at time of<br>testing | ZFAC1_1XZB<br>Y_P801                                           | BY_SEXefcod<br>e |            |            |
|-----------------------------|--------------|-------------------------------------------------------------------------------|----------------------------------------------------------------|------------------|------------|------------|
| 2                           | Correlations | Zscore: Grade in which student was enrolled at time of testing                | 1.000                                                          | .019             | .008       |            |
|                             |              | ZFAC1_1XZBY_P801                                                              | .019                                                           | 1.000            | .021       |            |
|                             |              | BY_SEXefcode                                                                  | .008                                                           | .021             | 1.000      |            |
|                             |              | Zscore: Socioeconomic index                                                   | .051                                                           | .045             | -.023      |            |
|                             |              | ZFAC1_1_sq                                                                    | -.003                                                          | -.170            | -.014      |            |
|                             |              | ZBY_P801_sq                                                                   | .046                                                           | -.152            | .013       |            |
|                             |              | BY_RACEwefcode                                                                | .012                                                           | -.089            | .080       |            |
|                             |              | Zscore: Maturity Factor                                                       | -.105                                                          | -.106            | -.225      |            |
|                             |              | ZIQ_comp_vms_sq                                                               | -.060                                                          | -.027            | .039       |            |
|                             |              | Zscore(IQ_comp_vms)                                                           | -.247                                                          | .041             | .133       |            |
|                             |              | ZIQ_comp_vmsXZBY_P801                                                         | .016                                                           | -.060            | -.020      |            |
|                             |              | Covariances                                                                   | Zscore: Grade in which student was enrolled at time of testing | 5.233E-006       | 9.819E-008 | 4.134E-008 |
|                             |              |                                                                               | ZFAC1_1XZBY_P801                                               | 9.819E-008       | 5.270E-006 | 1.151E-007 |
| BY_SEXefcode                | 4.134E-008   |                                                                               | 1.151E-007                                                     | 5.513E-006       |            |            |
| Zscore: Socioeconomic index | 2.891E-007   |                                                                               | 2.555E-007                                                     | -1.323E-007      |            |            |
| ZFAC1_1_sq                  | -1.207E-008  |                                                                               | -7.455E-007                                                    | -6.427E-008      |            |            |
| ZBY_P801_sq                 | 2.076E-007   |                                                                               | -6.939E-007                                                    | 5.930E-008       |            |            |
| BY_RACEwefcode              | 1.218E-007   |                                                                               | -9.436E-007                                                    | 8.670E-007       |            |            |
| Zscore: Maturity Factor     | -5.526E-007  |                                                                               | -5.571E-007                                                    | -1.211E-006      |            |            |
| ZIQ_comp_vms_sq             | -2.899E-007  |                                                                               | -1.285E-007                                                    | 1.903E-007       |            |            |
| Zscore(IQ_comp_vms)         | -1.489E-006  |                                                                               | 2.491E-007                                                     | 8.237E-007       |            |            |
| ZIQ_comp_vmsXZBY_P801       | 1.032E-007   | -3.890E-007                                                                   | -1.323E-007                                                    |                  |            |            |

**Coefficient Correlations<sup>a,b</sup>**

| Model                       |              | Zscore:<br>Socioeconomic<br>index                              | ZFAC1_1_sq                                                     | ZBY_P801_sq      |             |             |
|-----------------------------|--------------|----------------------------------------------------------------|----------------------------------------------------------------|------------------|-------------|-------------|
| 2                           | Correlations | Zscore: Grade in which student was enrolled at time of testing | .051                                                           | -.003            | .046        |             |
|                             |              | ZFAC1_1XZBY_P801                                               | .045                                                           | -.170            | -.152       |             |
|                             |              | BY_SEXefcode                                                   | -.023                                                          | -.014            | .013        |             |
|                             |              | Zscore: Socioeconomic index                                    | 1.000                                                          | .000             | .003        |             |
|                             |              | ZFAC1_1_sq                                                     | .000                                                           | 1.000            | .022        |             |
|                             |              | ZBY_P801_sq                                                    | .003                                                           | .022             | 1.000       |             |
|                             |              | BY_RACEwefcode                                                 | -.146                                                          | -.007            | .081        |             |
|                             |              | Zscore: Maturity Factor                                        | -.119                                                          | .016             | -.019       |             |
|                             |              | ZIQ_comp_vms_sq                                                | .015                                                           | -.001            | .122        |             |
|                             |              | Zscore(IQ_comp_vms)                                            | -.346                                                          | -.067            | -.002       |             |
|                             |              | ZIQ_comp_vmsXZBY_P801                                          | -.061                                                          | -.009            | -.500       |             |
|                             |              | Covariances                                                    | Zscore: Grade in which student was enrolled at time of testing | 2.891E-007       | -1.207E-008 | 2.076E-007  |
|                             |              |                                                                |                                                                | ZFAC1_1XZBY_P801 | 2.555E-007  | -7.455E-007 |
| BY_SEXefcode                | -1.323E-007  |                                                                |                                                                | -6.427E-008      | 5.930E-008  |             |
| Zscore: Socioeconomic index | 6.044E-006   |                                                                |                                                                | -6.032E-010      | 1.536E-008  |             |
| ZFAC1_1_sq                  | -6.032E-010  |                                                                |                                                                | 3.667E-006       | 8.436E-008  |             |
| ZBY_P801_sq                 | 1.536E-008   |                                                                |                                                                | 8.436E-008       | 3.966E-006  |             |
| BY_RACEwefcode              | -1.649E-006  |                                                                |                                                                | -6.220E-008      | 7.381E-007  |             |
| Zscore: Maturity Factor     | -6.689E-007  |                                                                |                                                                | 7.196E-008       | -8.711E-008 |             |
| ZIQ_comp_vms_sq             | 7.865E-008   |                                                                |                                                                | -5.425E-009      | 5.111E-007  |             |
| Zscore(IQ_comp_vms)         | -2.241E-006  |                                                                |                                                                | -3.356E-007      | -1.261E-008 |             |
| ZIQ_comp_vmsXZBY_P801       | -4.194E-007  |                                                                |                                                                | -4.776E-008      | -2.789E-006 |             |

**Coefficient Correlations<sup>a,b</sup>**

| Model |              |                                                                | BY_RACEwef<br>code | Zscore:<br>Maturity<br>Factor | ZIQ_comp_v<br>ms_sq |
|-------|--------------|----------------------------------------------------------------|--------------------|-------------------------------|---------------------|
| 2     | Correlations | Zscore: Grade in which student was enrolled at time of testing | .012               | -.105                         | -.060               |
|       |              | ZFAC1_1XZBY_P801                                               | -.089              | -.106                         | -.027               |
|       |              | BY_SEXefcode                                                   | .080               | -.225                         | .039                |
|       |              | Zscore: Socioeconomic index                                    | -.146              | -.119                         | .015                |
|       |              | ZFAC1_1_sq                                                     | -.007              | .016                          | -.001               |
|       |              | ZBY_P801_sq                                                    | .081               | -.019                         | .122                |
|       |              | BY_RACEwefcode                                                 | 1.000              | .079                          | .162                |
|       |              | Zscore: Maturity Factor                                        | .079               | 1.000                         | .021                |
|       |              | ZIQ_comp_vms_sq                                                | .162               | .021                          | 1.000               |
|       |              | Zscore(IQ_comp_vms)                                            | -.240              | -.128                         | -.166               |
|       |              | ZIQ_comp_vmsXZBY_P801                                          | .052               | .010                          | -.449               |
|       | Covariances  | Zscore: Grade in which student was enrolled at time of testing | 1.218E-007         | -5.526E-007                   | -2.899E-007         |
|       |              | ZFAC1_1XZBY_P801                                               | -9.436E-007        | -5.571E-007                   | -1.285E-007         |
|       |              | BY_SEXefcode                                                   | 8.670E-007         | -1.211E-006                   | 1.903E-007          |
|       |              | Zscore: Socioeconomic index                                    | -1.649E-006        | -6.689E-007                   | 7.865E-008          |
|       |              | ZFAC1_1_sq                                                     | -6.220E-008        | 7.196E-008                    | -5.425E-009         |
|       |              | ZBY_P801_sq                                                    | 7.381E-007         | -8.711E-008                   | 5.111E-007          |
|       |              | BY_RACEwefcode                                                 | 2.115E-005         | 8.304E-007                    | 1.561E-006          |
|       |              | Zscore: Maturity Factor                                        | 8.304E-007         | 5.265E-006                    | 1.001E-007          |
|       |              | ZIQ_comp_vms_sq                                                | 1.561E-006         | 1.001E-007                    | 4.415E-006          |
|       |              | Zscore(IQ_comp_vms)                                            | -2.909E-006        | -7.711E-007                   | -9.161E-007         |
|       |              | ZIQ_comp_vmsXZBY_P801                                          | 6.761E-007         | 6.344E-008                    | -2.644E-006         |

**Coefficient Correlations<sup>a,b</sup>**

| Model |              |                                                                | Zscore<br>(IQ_comp_vms) | ZIQ_comp_vmsXZBY_P801 |
|-------|--------------|----------------------------------------------------------------|-------------------------|-----------------------|
| 2     | Correlations | Zscore: Grade in which student was enrolled at time of testing | -.247                   | .016                  |
|       |              | ZFAC1_1XZBY_P801                                               | .041                    | -.060                 |
|       |              | BY_SEXefcode                                                   | .133                    | -.020                 |
|       |              | Zscore: Socioeconomic index                                    | -.346                   | -.061                 |
|       |              | ZFAC1_1_sq                                                     | -.067                   | -.009                 |
|       |              | ZBY_P801_sq                                                    | -.002                   | -.500                 |
|       |              | BY_RACEwefcode                                                 | -.240                   | .052                  |
|       |              | Zscore: Maturity Factor                                        | -.128                   | .010                  |
|       |              | ZIQ_comp_vms_sq                                                | -.166                   | -.449                 |
|       |              | Zscore(IQ_comp_vms)                                            | 1.000                   | -.005                 |
|       |              | ZIQ_comp_vmsXZBY_P801                                          | -.005                   | 1.000                 |
|       | Covariances  | Zscore: Grade in which student was enrolled at time of testing | -1.489E-006             | 1.032E-007            |
|       |              | ZFAC1_1XZBY_P801                                               | 2.491E-007              | -3.890E-007           |
|       |              | BY_SEXefcode                                                   | 8.237E-007              | -1.323E-007           |
|       |              | Zscore: Socioeconomic index                                    | -2.241E-006             | -4.194E-007           |
|       |              | ZFAC1_1_sq                                                     | -3.356E-007             | -4.776E-008           |
|       |              | ZBY_P801_sq                                                    | -1.261E-008             | -2.789E-006           |
|       |              | BY_RACEwefcode                                                 | -2.909E-006             | 6.761E-007            |
|       |              | Zscore: Maturity Factor                                        | -7.711E-007             | 6.344E-008            |
|       |              | ZIQ_comp_vms_sq                                                | -9.161E-007             | -2.644E-006           |
|       |              | Zscore(IQ_comp_vms)                                            | 6.927E-006              | -3.462E-008           |
|       |              | ZIQ_comp_vmsXZBY_P801                                          | -3.462E-008             | 7.856E-006            |

a. Dependent Variable: Estimated annual earnings on current job (natural logarithm)

b. Weighted Least Squares Regression - Weighted by Eleven-year followup weight B

REGRESSION

/MISSING LISTWISE

/REGWGT=Y11\_WTB

/STATISTICS COEFF OUTS CI(95) R ANOVA BCOV CHANGE

/CRITERIA=PIN(.05) POUT(.10)

```

/NOORIGIN
/DEPENDENT Y11_TSEI2
/METHOD=ENTER ZFAC1_1 ZBY_P801 ZFAC1_1XZBY_P801 ZFAC1_1_sq ZBY_P801_sq BY_S
EXefcode BY_RACEwefcode ZBY_TESTGRD
/METHOD=ENTER ZIQ_comp_vms ZIQ_comp_vms_sq ZIQ_comp_vmsXZBY_P801.

```

## Regression

[DataSet1] C:\Users\ridamian\Dropbox\PT\PT Paper\PT base year and follow up 1  
1-18-11\_Rodica2\_credible only\_1\_used for paper\_20.sav

**Variables Entered/Removed<sup>a,b</sup>**

| Model | Variables Entered                                                                                                                                                                                                                                                     | Variables Removed | Method |
|-------|-----------------------------------------------------------------------------------------------------------------------------------------------------------------------------------------------------------------------------------------------------------------------|-------------------|--------|
| 1     | Zscore:<br>Grade in<br>which student<br>was enrolled<br>at time of<br>testing,<br>ZFAC1_1XZB<br>Y_P801,<br>BY_SEXefcod<br>e, Zscore:<br>Socioeconomi<br>c index,<br>ZFAC1_1_sq,<br>ZBY_P801_sq<br>,<br>BY_RACEwef<br>code, Zscore:<br>Maturity<br>Factor <sup>c</sup> |                   | Enter  |
| 2     | ZIQ_comp_v<br>ms_sq,<br>Zscore<br>(IQ_comp_vm<br>s),<br>ZIQ_comp_v<br>msXZBY_P80<br>1 <sup>c</sup>                                                                                                                                                                    |                   | Enter  |

- a. Dependent Variable: Y11 occupational prestige scores
- b. Weighted Least Squares Regression - Weighted by Eleven-year followup weight B
- c. All requested variables entered.

**Model Summary**

| Model | R                 | R Square | Adjusted R Square | Std. Error of the Estimate | Change Statistics |          |     |
|-------|-------------------|----------|-------------------|----------------------------|-------------------|----------|-----|
|       |                   |          |                   |                            | R Square Change   | F Change | df1 |
| 1     | .403 <sup>a</sup> | .162     | .162              | 542.49061                  | .162              | 1294.683 | 8   |
| 2     | .529 <sup>b</sup> | .280     | .280              | 502.91855                  | .118              | 2919.472 | 3   |

**Model Summary**

| Model | Change Statistics |               |
|-------|-------------------|---------------|
|       | df2               | Sig. F Change |
| 1     | 53530             | .000          |
| 2     | 53527             | .000          |

- a. Predictors: (Constant), Zscore: Grade in which student was enrolled at time of testing, ZFAC1\_1XZBY\_P801, BY\_SEXefcode, Zscore: Socioeconomic index, ZFAC1\_1\_sq, ZBY\_P801\_sq, BY\_RACEwefcode, Zscore: Maturity Factor
- b. Predictors: (Constant), Zscore: Grade in which student was enrolled at time of testing, ZFAC1\_1XZBY\_P801, BY\_SEXefcode, Zscore: Socioeconomic index, ZFAC1\_1\_sq, ZBY\_P801\_sq, BY\_RACEwefcode, Zscore: Maturity Factor, ZIQ\_comp\_vms\_sq, Zscore(IQ\_comp\_vms), ZIQ\_comp\_vmsXZBY\_P801

**ANOVA<sup>a,b</sup>**

| Model |            | Sum of Squares | df    | Mean Square | F        | Sig.              |
|-------|------------|----------------|-------|-------------|----------|-------------------|
| 1     | Regression | 3048160252     | 8     | 381020031.5 | 1294.683 | .000 <sup>c</sup> |
|       | Residual   | 15753668223    | 53530 | 294296.062  |          |                   |
|       | Total      | 18801828475    | 53538 |             |          |                   |
| 2     | Regression | 5263401050     | 11    | 478491004.5 | 1891.814 | .000 <sup>d</sup> |
|       | Residual   | 13538427425    | 53527 | 252927.073  |          |                   |
|       | Total      | 18801828475    | 53538 |             |          |                   |

- a. Dependent Variable: Y11 occupational prestige scores
- b. Weighted Least Squares Regression - Weighted by Eleven-year followup weight B
- c. Predictors: (Constant), Zscore: Grade in which student was enrolled at time of testing, ZFAC1\_1XZBY\_P801, BY\_SEXefcode, Zscore: Socioeconomic index, ZFAC1\_1\_sq, ZBY\_P801\_sq, BY\_RACEwefcode, Zscore: Maturity Factor
- d. Predictors: (Constant), Zscore: Grade in which student was enrolled at time of testing, ZFAC1\_1XZBY\_P801, BY\_SEXefcode, Zscore: Socioeconomic index, ZFAC1\_1\_sq, ZBY\_P801\_sq, BY\_RACEwefcode, Zscore: Maturity Factor, ZIQ\_comp\_vms\_sq, Zscore(IQ\_comp\_vms), ZIQ\_comp\_vmsXZBY\_P801

**Coefficients<sup>a,b</sup>**

| Model |                                                                | Unstandardized Coefficients |            | Standardized Coefficients | t       | Sig. |
|-------|----------------------------------------------------------------|-----------------------------|------------|---------------------------|---------|------|
|       |                                                                | B                           | Std. Error | Beta                      |         |      |
| 1     | (Constant)                                                     | 40.558                      | .192       |                           | 211.649 | .000 |
|       | Zscore: Maturity Factor                                        | 3.032                       | .086       | .147                      | 35.129  | .000 |
|       | Zscore: Socioeconomic index                                    | 6.787                       | .086       | .328                      | 78.812  | .000 |
|       | ZFAC1_1XZBY_P801                                               | .157                        | .086       | .008                      | 1.814   | .070 |
|       | ZFAC1_1_sq                                                     | .233                        | .073       | .013                      | 3.203   | .001 |
|       | ZBY_P801_sq                                                    | .874                        | .064       | .056                      | 13.597  | .000 |
|       | BY_SEXefcode                                                   | -2.662                      | .088       | -.124                     | -30.369 | .000 |
|       | BY_RACEwefcode                                                 | .273                        | .164       | .007                      | 1.667   | .096 |
|       | Zscore: Grade in which student was enrolled at time of testing | .133                        | .083       | .006                      | 1.602   | .109 |
| 2     | (Constant)                                                     | 42.536                      | .200       |                           | 212.482 | .000 |
|       | Zscore: Maturity Factor                                        | 2.136                       | .081       | .103                      | 26.473  | .000 |
|       | Zscore: Socioeconomic index                                    | 3.958                       | .085       | .191                      | 46.324  | .000 |
|       | ZFAC1_1XZBY_P801                                               | .326                        | .080       | .016                      | 4.056   | .000 |
|       | ZFAC1_1_sq                                                     | -.200                       | .068       | -.011                     | -2.966  | .003 |
|       | ZBY_P801_sq                                                    | .486                        | .069       | .031                      | 7.014   | .000 |
|       | BY_SEXefcode                                                   | -1.582                      | .082       | -.074                     | -19.265 | .000 |
|       | BY_RACEwefcode                                                 | -2.516                      | .160       | -.064                     | -15.725 | .000 |
|       | Zscore: Grade in which student was enrolled at time of testing | -1.817                      | .080       | -.088                     | -22.802 | .000 |
|       | Zscore(IQ_comp_vms)                                            | 8.212                       | .092       | .399                      | 88.910  | .000 |
|       | ZIQ_comp_vms_sq                                                | .601                        | .073       | .035                      | 8.220   | .000 |
|       | ZIQ_comp_vmsXZBY_P801                                          | .354                        | .097       | .018                      | 3.647   | .000 |

**Coefficients<sup>a,b</sup>**

| Model |                                                                | 95.0% Confidence Interval for B |             |
|-------|----------------------------------------------------------------|---------------------------------|-------------|
|       |                                                                | Lower Bound                     | Upper Bound |
| 1     | (Constant)                                                     | 40.182                          | 40.934      |
|       | Zscore: Maturity Factor                                        | 2.863                           | 3.201       |
|       | Zscore: Socioeconomic index                                    | 6.619                           | 6.956       |
|       | ZFAC1_1XZBY_P801                                               | -.013                           | .326        |
|       | ZFAC1_1_sq                                                     | .090                            | .375        |
|       | ZBY_P801_sq                                                    | .748                            | 1.000       |
|       | BY_SEXefcode                                                   | -2.833                          | -2.490      |
|       | BY_RACEwefcode                                                 | -.048                           | .595        |
|       | Zscore: Grade in which student was enrolled at time of testing | -.030                           | .295        |
| 2     | (Constant)                                                     | 42.143                          | 42.928      |
|       | Zscore: Maturity Factor                                        | 1.978                           | 2.294       |
|       | Zscore: Socioeconomic index                                    | 3.790                           | 4.125       |
|       | ZFAC1_1XZBY_P801                                               | .169                            | .484        |
|       | ZFAC1_1_sq                                                     | -.333                           | -.068       |
|       | ZBY_P801_sq                                                    | .350                            | .622        |
|       | BY_SEXefcode                                                   | -1.743                          | -1.421      |
|       | BY_RACEwefcode                                                 | -2.829                          | -2.202      |
|       | Zscore: Grade in which student was enrolled at time of testing | -1.973                          | -1.660      |
|       | Zscore(IQ_comp_vms)                                            | 8.031                           | 8.393       |
|       | ZIQ_comp_vms_sq                                                | .458                            | .744        |
|       | ZIQ_comp_vmsXZBY_P801                                          | .164                            | .544        |

a. Dependent Variable: Y11 occupational prestige scores

b. Weighted Least Squares Regression - Weighted by Eleven-year followup weight B



**Excluded Variables<sup>a,b</sup>**

| Model | Beta In               | t                 | Sig.   | Partial Correlation | Collinearity Statistics |      |
|-------|-----------------------|-------------------|--------|---------------------|-------------------------|------|
|       |                       |                   |        |                     | Tolerance               |      |
| 1     | Zscore(IQ_comp_vms)   | .409 <sup>c</sup> | 92.762 | .000                | .372                    | .695 |
|       | ZIQ_comp_vms_sq       | .109 <sup>c</sup> | 26.742 | .000                | .115                    | .928 |
|       | ZIQ_comp_vmsXZBY_P801 | .079 <sup>c</sup> | 16.669 | .000                | .072                    | .702 |

a. Dependent Variable: Y11 occupational prestige scores

b. Weighted Least Squares Regression - Weighted by Eleven-year followup weight B

c. Predictors in the Model: (Constant), Zscore: Grade in which student was enrolled at time of testing, ZFAC1\_1XZBY\_P801, BY\_SEXefcode, Zscore: Socioeconomic index, ZFAC1\_1\_sq, ZBY\_P801\_sq, BY\_RACEwefcode, Zscore: Maturity Factor

**Coefficient Correlations<sup>a,b</sup>**

| Model                   |              | Zscore: Grade in which student was enrolled at time of testing | ZFAC1_1XZBY_P801 | BY_SEXefcode |             |
|-------------------------|--------------|----------------------------------------------------------------|------------------|--------------|-------------|
| 1                       | Correlations | Zscore: Grade in which student was enrolled at time of testing | 1.000            | .031         | .060        |
|                         |              | ZFAC1_1XZBY_P801                                               | .031             | 1.000        | .030        |
|                         |              | BY_SEXefcode                                                   | .060             | .030         | 1.000       |
|                         |              | Zscore: Socioeconomic index                                    | -.048            | .052         | .032        |
|                         |              | ZFAC1_1_sq                                                     | -.023            | -.169        | -.010       |
|                         |              | ZBY_P801_sq                                                    | .056             | -.213        | .007        |
|                         |              | BY_RACEwefcode                                                 | -.043            | -.077        | .102        |
|                         |              | Zscore: Maturity Factor                                        | -.148            | -.104        | -.209       |
|                         | Covariances  | Zscore: Grade in which student was enrolled at time of testing | .007             | .000         | .000        |
|                         |              | ZFAC1_1XZBY_P801                                               | .000             | .007         | .000        |
|                         |              | BY_SEXefcode                                                   | .000             | .000         | .008        |
|                         |              | Zscore: Socioeconomic index                                    | .000             | .000         | .000        |
|                         |              | ZFAC1_1_sq                                                     | .000             | -.001        | -6.231E-005 |
|                         |              | ZBY_P801_sq                                                    | .000             | -.001        | 3.887E-005  |
|                         |              | BY_RACEwefcode                                                 | -.001            | -.001        | .001        |
| Zscore: Maturity Factor | -.001        | -.001                                                          | -.002            |              |             |

**Coefficient Correlations<sup>a,b</sup>**

| Model                   |              | Zscore:<br>Socioeconomic<br>index                              | ZFAC1_1_sq | ZBY_P801_sq |            |
|-------------------------|--------------|----------------------------------------------------------------|------------|-------------|------------|
| 1                       | Correlations | Zscore: Grade in which student was enrolled at time of testing | -.048      | -.023       | .056       |
|                         |              | ZFAC1_1XZBY_P801                                               | .052       | -.169       | -.213      |
|                         |              | BY_SEXefcode                                                   | .032       | -.010       | .007       |
|                         |              | Zscore: Socioeconomic index                                    | 1.000      | -.025       | -.060      |
|                         |              | ZFAC1_1_sq                                                     | -.025      | 1.000       | .024       |
|                         |              | ZBY_P801_sq                                                    | -.060      | .024        | 1.000      |
|                         |              | BY_RACEwefcode                                                 | -.243      | -.019       | .155       |
|                         |              | Zscore: Maturity Factor                                        | -.175      | .009        | -.019      |
|                         | Covariances  | Zscore: Grade in which student was enrolled at time of testing | .000       | .000        | .000       |
|                         |              | ZFAC1_1XZBY_P801                                               | .000       | -.001       | -.001      |
|                         |              | BY_SEXefcode                                                   | .000       | -6.231E-005 | 3.887E-005 |
|                         |              | Zscore: Socioeconomic index                                    | .007       | .000        | .000       |
|                         |              | ZFAC1_1_sq                                                     | .000       | .005        | .000       |
|                         |              | ZBY_P801_sq                                                    | .000       | .000        | .004       |
|                         |              | BY_RACEwefcode                                                 | -.003      | .000        | .002       |
| Zscore: Maturity Factor | -.001        | 5.946E-005                                                     | .000       |             |            |

**Coefficient Correlations<sup>a,b</sup>**

| Model |              |                                                                | BY_RACEwef<br>code | Zscore:<br>Maturity<br>Factor | ZIQ_comp_v<br>ms_sq |
|-------|--------------|----------------------------------------------------------------|--------------------|-------------------------------|---------------------|
| 1     | Correlations | Zscore: Grade in which student was enrolled at time of testing | -.043              | -.148                         |                     |
|       |              | ZFAC1_1XZBY_P801                                               | -.077              | -.104                         |                     |
|       |              | BY_SEXefcode                                                   | .102               | -.209                         |                     |
|       |              | Zscore: Socioeconomic index                                    | -.243              | -.175                         |                     |
|       |              | ZFAC1_1_sq                                                     | -.019              | .009                          |                     |
|       |              | ZBY_P801_sq                                                    | .155               | -.019                         |                     |
|       |              | BY_RACEwefcode                                                 | 1.000              | .059                          |                     |
|       |              | Zscore: Maturity Factor                                        | .059               | 1.000                         |                     |
|       | Covariances  | Zscore: Grade in which student was enrolled at time of testing | -.001              | -.001                         |                     |
|       |              | ZFAC1_1XZBY_P801                                               | -.001              | -.001                         |                     |
|       |              | BY_SEXefcode                                                   | .001               | -.002                         |                     |
|       |              | Zscore: Socioeconomic index                                    | -.003              | -.001                         |                     |
|       |              | ZFAC1_1_sq                                                     | .000               | 5.946E-005                    |                     |
|       |              | ZBY_P801_sq                                                    | .002               | .000                          |                     |
|       |              | BY_RACEwefcode                                                 | .027               | .001                          |                     |
|       |              | Zscore: Maturity Factor                                        | .001               | .007                          |                     |

**Coefficient Correlations<sup>a,b</sup>**

| Model                                                                                                                                                                                                                                | Zscore<br>(IQ_comp_vms) | ZIQ_comp_vmsXZBY_P801 |
|--------------------------------------------------------------------------------------------------------------------------------------------------------------------------------------------------------------------------------------|-------------------------|-----------------------|
| 1      Correlations      Zscore: Grade in which student was enrolled at time of testing<br>ZFAC1_1XZBY_P801<br>BY_SEXefcode<br>Zscore: Socioeconomic index<br>ZFAC1_1_sq<br>ZBY_P801_sq<br>BY_RACEwefcode<br>Zscore: Maturity Factor |                         |                       |
| Covariances      Zscore: Grade in which student was enrolled at time of testing<br>ZFAC1_1XZBY_P801<br>BY_SEXefcode<br>Zscore: Socioeconomic index<br>ZFAC1_1_sq<br>ZBY_P801_sq<br>BY_RACEwefcode<br>Zscore: Maturity Factor         |                         |                       |

**Coefficient Correlations<sup>a,b</sup>**

| Model                       |              | Zscore:<br>Grade in<br>which student<br>was enrolled<br>at time of<br>testing | ZFAC1_1XZB<br>Y_P801                                           | BY_SEXefcod<br>e |            |      |      |
|-----------------------------|--------------|-------------------------------------------------------------------------------|----------------------------------------------------------------|------------------|------------|------|------|
| 2                           | Correlations | Zscore: Grade in which student was enrolled at time of testing                | 1.000                                                          | .023             | .019       |      |      |
|                             |              | ZFAC1_1XZBY_P801                                                              | .023                                                           | 1.000            | .035       |      |      |
|                             |              | BY_SEXefcode                                                                  | .019                                                           | .035             | 1.000      |      |      |
|                             |              | Zscore: Socioeconomic index                                                   | .048                                                           | .041             | -.019      |      |      |
|                             |              | ZFAC1_1_sq                                                                    | -.005                                                          | -.170            | -.019      |      |      |
|                             |              | ZBY_P801_sq                                                                   | .053                                                           | -.145            | .013       |      |      |
|                             |              | BY_RACEwefcode                                                                | .006                                                           | -.093            | .069       |      |      |
|                             |              | Zscore: Maturity Factor                                                       | -.112                                                          | -.109            | -.222      |      |      |
|                             |              | ZIQ_comp_vms_sq                                                               | -.054                                                          | -.014            | .033       |      |      |
|                             |              | Zscore(IQ_comp_vms)                                                           | -.243                                                          | .041             | .134       |      |      |
|                             |              | ZIQ_comp_vmsXZBY_P801                                                         | .014                                                           | -.066            | -.028      |      |      |
|                             |              | Covariances                                                                   | Zscore: Grade in which student was enrolled at time of testing | .006             | .000       | .000 |      |
|                             |              |                                                                               |                                                                | ZFAC1_1XZBY_P801 | .000       | .006 | .000 |
|                             |              |                                                                               |                                                                | BY_SEXefcode     | .000       | .000 | .007 |
| Zscore: Socioeconomic index | .000         |                                                                               |                                                                | .000             | .000       |      |      |
| ZFAC1_1_sq                  | -2.515E-005  |                                                                               |                                                                | -.001            | .000       |      |      |
| ZBY_P801_sq                 | .000         |                                                                               |                                                                | -.001            | 7.473E-005 |      |      |
| BY_RACEwefcode              | 7.107E-005   |                                                                               |                                                                | -.001            | .001       |      |      |
| Zscore: Maturity Factor     | -.001        |                                                                               |                                                                | -.001            | -.001      |      |      |
| ZIQ_comp_vms_sq             | .000         |                                                                               |                                                                | -8.232E-005      | .000       |      |      |
| Zscore(IQ_comp_vms)         | -.002        |                                                                               |                                                                | .000             | .001       |      |      |
| ZIQ_comp_vmsXZBY_P801       | .000         | -.001                                                                         | .000                                                           |                  |            |      |      |

**Coefficient Correlations<sup>a,b</sup>**

| Model                       |              | Zscore:<br>Socioeconomic<br>index                              | ZFAC1_1_sq | ZBY_P801_sq                                                    |             |             |       |
|-----------------------------|--------------|----------------------------------------------------------------|------------|----------------------------------------------------------------|-------------|-------------|-------|
| 2                           | Correlations | Zscore: Grade in which student was enrolled at time of testing | .048       | -.005                                                          | .053        |             |       |
|                             |              | ZFAC1_1XZBY_P801                                               | .041       | -.170                                                          | -.145       |             |       |
|                             |              | BY_SEXefcode                                                   | -.019      | -.019                                                          | .013        |             |       |
|                             |              | Zscore: Socioeconomic index                                    | 1.000      | .001                                                           | -.017       |             |       |
|                             |              | ZFAC1_1_sq                                                     | .001       | 1.000                                                          | .024        |             |       |
|                             |              | ZBY_P801_sq                                                    | -.017      | .024                                                           | 1.000       |             |       |
|                             |              | BY_RACEwefcode                                                 | -.145      | -.005                                                          | .082        |             |       |
|                             |              | Zscore: Maturity Factor                                        | -.119      | .018                                                           | -.022       |             |       |
|                             |              | ZIQ_comp_vms_sq                                                | .005       | -.005                                                          | .116        |             |       |
|                             |              | Zscore(IQ_comp_vms)                                            | -.343      | -.066                                                          | .006        |             |       |
|                             |              | ZIQ_comp_vmsXZBY_P801                                          | -.041      | -.001                                                          | -.497       |             |       |
|                             |              | Covariances                                                    |            | Zscore: Grade in which student was enrolled at time of testing | .000        | -2.515E-005 | .000  |
|                             |              |                                                                |            | ZFAC1_1XZBY_P801                                               | .000        | -.001       | -.001 |
| BY_SEXefcode                | .000         |                                                                |            | .000                                                           | 7.473E-005  |             |       |
| Zscore: Socioeconomic index | .007         |                                                                |            | 6.139E-006                                                     | -9.890E-005 |             |       |
| ZFAC1_1_sq                  | 6.139E-006   |                                                                |            | .005                                                           | .000        |             |       |
| ZBY_P801_sq                 | -9.890E-005  |                                                                |            | .000                                                           | .005        |             |       |
| BY_RACEwefcode              | -.002        |                                                                |            | -5.128E-005                                                    | .001        |             |       |
| Zscore: Maturity Factor     | -.001        |                                                                |            | 9.612E-005                                                     | .000        |             |       |
| ZIQ_comp_vms_sq             | 3.257E-005   |                                                                |            | -2.309E-005                                                    | .001        |             |       |
| Zscore(IQ_comp_vms)         | -.003        |                                                                |            | .000                                                           | 3.947E-005  |             |       |
| ZIQ_comp_vmsXZBY_P801       | .000         | -6.960E-006                                                    | -.003      |                                                                |             |             |       |

**Coefficient Correlations<sup>a,b</sup>**

| Model |              |                                                                | BY_RACEwef<br>code | Zscore:<br>Maturity<br>Factor | ZIQ_comp_v<br>ms_sq |
|-------|--------------|----------------------------------------------------------------|--------------------|-------------------------------|---------------------|
| 2     | Correlations | Zscore: Grade in which student was enrolled at time of testing | .006               | -.112                         | -.054               |
|       |              | ZFAC1_1XZBY_P801                                               | -.093              | -.109                         | -.014               |
|       |              | BY_SEXefcode                                                   | .069               | -.222                         | .033                |
|       |              | Zscore: Socioeconomic index                                    | -.145              | -.119                         | .005                |
|       |              | ZFAC1_1_sq                                                     | -.005              | .018                          | -.005               |
|       |              | ZBY_P801_sq                                                    | .082               | -.022                         | .116                |
|       |              | BY_RACEwefcode                                                 | 1.000              | .090                          | .174                |
|       |              | Zscore: Maturity Factor                                        | .090               | 1.000                         | .022                |
|       |              | ZIQ_comp_vms_sq                                                | .174               | .022                          | 1.000               |
|       |              | Zscore(IQ_comp_vms)                                            | -.255              | -.127                         | -.163               |
|       |              | ZIQ_comp_vmsXZBY_P801                                          | .051               | .012                          | -.439               |
|       | Covariances  | Zscore: Grade in which student was enrolled at time of testing | 7.107E-005         | -.001                         | .000                |
|       |              | ZFAC1_1XZBY_P801                                               | -.001              | -.001                         | -8.232E-005         |
|       |              | BY_SEXefcode                                                   | .001               | -.001                         | .000                |
|       |              | Zscore: Socioeconomic index                                    | -.002              | -.001                         | 3.257E-005          |
|       |              | ZFAC1_1_sq                                                     | -5.128E-005        | 9.612E-005                    | -2.309E-005         |
|       |              | ZBY_P801_sq                                                    | .001               | .000                          | .001                |
|       |              | BY_RACEwefcode                                                 | .026               | .001                          | .002                |
|       |              | Zscore: Maturity Factor                                        | .001               | .007                          | .000                |
|       |              | ZIQ_comp_vms_sq                                                | .002               | .000                          | .005                |
|       |              | Zscore(IQ_comp_vms)                                            | -.004              | -.001                         | -.001               |
|       |              | ZIQ_comp_vmsXZBY_P801                                          | .001               | 9.730E-005                    | -.003               |

**Coefficient Correlations<sup>a,b</sup>**

| Model                 |                             | Zscore<br>(IQ_comp_vms)                                        | ZIQ_comp_vmsXZBY_P801                                          |             |
|-----------------------|-----------------------------|----------------------------------------------------------------|----------------------------------------------------------------|-------------|
| 2                     | Correlations                | Zscore: Grade in which student was enrolled at time of testing | .243                                                           | .014        |
|                       |                             | ZFAC1_1XZBY_P801                                               | .041                                                           | -.066       |
|                       |                             | BY_SEXefcode                                                   | .134                                                           | -.028       |
|                       |                             | Zscore: Socioeconomic index                                    | -.343                                                          | -.041       |
|                       |                             | ZFAC1_1_sq                                                     | -.066                                                          | -.001       |
|                       |                             | ZBY_P801_sq                                                    | .006                                                           | -.497       |
|                       |                             | BY_RACEwefcode                                                 | -.255                                                          | .051        |
|                       |                             | Zscore: Maturity Factor                                        | -.127                                                          | .012        |
|                       |                             | ZIQ_comp_vms_sq                                                | -.163                                                          | -.439       |
|                       |                             | Zscore(IQ_comp_vms)                                            | 1.000                                                          | -.023       |
|                       |                             | ZIQ_comp_vmsXZBY_P801                                          | -.023                                                          | 1.000       |
|                       |                             | Covariances                                                    | Zscore: Grade in which student was enrolled at time of testing | -.002       |
|                       | ZFAC1_1XZBY_P801            |                                                                | .000                                                           | -.001       |
|                       | BY_SEXefcode                |                                                                | .001                                                           | .000        |
|                       | Zscore: Socioeconomic index |                                                                | -.003                                                          | .000        |
|                       | ZFAC1_1_sq                  |                                                                | .000                                                           | -6.960E-006 |
|                       | ZBY_P801_sq                 |                                                                | 3.947E-005                                                     | -.003       |
|                       | BY_RACEwefcode              |                                                                | -.004                                                          | .001        |
|                       | Zscore: Maturity Factor     | -.001                                                          | 9.730E-005                                                     |             |
| ZIQ_comp_vms_sq       | -.001                       | -.003                                                          |                                                                |             |
| Zscore(IQ_comp_vms)   | .009                        | .000                                                           |                                                                |             |
| ZIQ_comp_vmsXZBY_P801 | .000                        | .009                                                           |                                                                |             |

a. Dependent Variable: Y11 occupational prestige scores

b. Weighted Least Squares Regression - Weighted by Eleven-year followup weight B

\*\*\*Extraversion factor and 3 outcomes\*\*\*\*

```
REGRESSION
/MISSING LISTWISE
/REGWGT=Y11_WTB
```



```

/STATISTICS COEFF OUTS CI(95) R ANOVA BCOV CHANGE
/CRITERIA=PIN(.05) POUT(.10)
/NOORIGIN
/DEPENDENT Y11_E001R
/METHOD=ENTER ZFAC2_1 ZBY_P801 ZFAC2_1XZBY_P801 ZFAC2_1_sq ZBY_P801_sq BY_S
EXefcode BY_RACEwefcode ZBY_TESTGRD
/METHOD=ENTER ZIQ_comp_vms ZIQ_comp_vms_sq ZIQ_comp_vmsXZBY_P801.

```

## Regression

[DataSet1] C:\Users\ridamian\Dropbox\PT\PT Paper\PT base year and follow up 1  
1-18-11\_Rodica2\_credible only\_1\_used for paper\_20.sav

**Variables Entered/Removed<sup>a,b</sup>**

| Model | Variables Entered                                                                                                                                                                                                                                                         | Variables Removed | Method |
|-------|---------------------------------------------------------------------------------------------------------------------------------------------------------------------------------------------------------------------------------------------------------------------------|-------------------|--------|
| 1     | Zscore:<br>Grade in<br>which student<br>was enrolled<br>at time of<br>testing,<br>BY_SEXefcod<br>e,<br>ZFAC2_1XZB<br>Y_P801,<br>BY_RACEwef<br>code, Zscore:<br>Extraversion<br>Factor,<br>ZBY_P801_sq<br>, Zscore:<br>Socioeconomi<br>c index,<br>ZFAC2_1_sq <sup>c</sup> | .                 | Enter  |
| 2     | ZIQ_comp_v<br>ms_sq,<br>Zscore<br>(IQ_comp_vm<br>s),<br>ZIQ_comp_v<br>msXZBY_P80<br>1 <sup>c</sup>                                                                                                                                                                        | .                 | Enter  |

a. Dependent Variable: Y11 Amount of Education (6 pt coding)

b. Weighted Least Squares Regression - Weighted by Eleven-year followup weight B

c. All requested variables entered.

**Model Summary**

| Model | R                 | R Square | Adjusted R Square | Std. Error of the Estimate | Change Statistics |          |     |
|-------|-------------------|----------|-------------------|----------------------------|-------------------|----------|-----|
|       |                   |          |                   |                            | R Square Change   | F Change | df1 |
| 1     | .491 <sup>a</sup> | .241     | .241              | 27.15818                   | .241              | 2962.755 | 8   |
| 2     | .619 <sup>b</sup> | .383     | .383              | 24.48705                   | .142              | 5724.729 | 3   |

**Model Summary**

| Model | Change Statistics |               |
|-------|-------------------|---------------|
|       | df2               | Sig. F Change |
| 1     | 74636             | .000          |
| 2     | 74633             | .000          |

- a. Predictors: (Constant), Zscore: Grade in which student was enrolled at time of testing, BY\_SEXefcode, ZFAC2\_1XZBY\_P801, BY\_RACEwefcode, Zscore: Extraversion Factor, ZBY\_P801\_sq, Zscore: Socioeconomic index, ZFAC2\_1\_sq
- b. Predictors: (Constant), Zscore: Grade in which student was enrolled at time of testing, BY\_SEXefcode, ZFAC2\_1XZBY\_P801, BY\_RACEwefcode, Zscore: Extraversion Factor, ZBY\_P801\_sq, Zscore: Socioeconomic index, ZFAC2\_1\_sq, ZIQ\_comp\_vms\_sq, Zscore(IQ\_comp\_vms), ZIQ\_comp\_vmsXZBY\_P801

**ANOVA<sup>a,b</sup>**

| Model |            | Sum of Squares | df    | Mean Square | F        | Sig.              |
|-------|------------|----------------|-------|-------------|----------|-------------------|
| 1     | Regression | 17481829.34    | 8     | 2185228.667 | 2962.755 | .000 <sup>c</sup> |
|       | Residual   | 55049012.67    | 74636 | 737.566     |          |                   |
|       | Total      | 72530842.01    | 74644 |             |          |                   |
| 2     | Regression | 27779737.67    | 11    | 2525430.697 | 4211.750 | .000 <sup>d</sup> |
|       | Residual   | 44751104.34    | 74633 | 599.616     |          |                   |
|       | Total      | 72530842.01    | 74644 |             |          |                   |

- a. Dependent Variable: Y11 Amount of Education (6 pt coding)
- b. Weighted Least Squares Regression - Weighted by Eleven-year followup weight B
- c. Predictors: (Constant), Zscore: Grade in which student was enrolled at time of testing, BY\_SEXefcode, ZFAC2\_1XZBY\_P801, BY\_RACEwefcode, Zscore: Extraversion Factor, ZBY\_P801\_sq, Zscore: Socioeconomic index, ZFAC2\_1\_sq
- d. Predictors: (Constant), Zscore: Grade in which student was enrolled at time of testing, BY\_SEXefcode, ZFAC2\_1XZBY\_P801, BY\_RACEwefcode, Zscore: Extraversion Factor, ZBY\_P801\_sq, Zscore: Socioeconomic index, ZFAC2\_1\_sq, ZIQ\_comp\_vms\_sq, Zscore(IQ\_comp\_vms), ZIQ\_comp\_vmsXZBY\_P801

**Coefficients<sup>a,b</sup>**

| Model |                                                                | Unstandardized Coefficients |            | Standardized Coefficients | t       | Sig. |
|-------|----------------------------------------------------------------|-----------------------------|------------|---------------------------|---------|------|
|       |                                                                | B                           | Std. Error | Beta                      |         |      |
| 1     | (Constant)                                                     | 2.759                       | .008       |                           | 325.673 | .000 |
|       | Zscore: Extraversion Factor                                    | .071                        | .004       | .065                      | 19.651  | .000 |
|       | Zscore: Socioeconomic index                                    | .459                        | .004       | .411                      | 123.267 | .000 |
|       | ZFAC2_1XZBY_P801                                               | -.026                       | .004       | -.024                     | -7.044  | .000 |
|       | ZFAC2_1_sq                                                     | .054                        | .003       | .062                      | 18.516  | .000 |
|       | ZBY_P801_sq                                                    | .080                        | .003       | .095                      | 28.666  | .000 |
|       | BY_SEXefcode                                                   | -.214                       | .003       | -.195                     | -61.030 | .000 |
|       | BY_RACEwefcode                                                 | -.104                       | .007       | -.046                     | -14.046 | .000 |
|       | Zscore: Grade in which student was enrolled at time of testing | .041                        | .003       | .038                      | 11.729  | .000 |
| 2     | (Constant)                                                     | 2.897                       | .009       |                           | 338.138 | .000 |
|       | Zscore: Extraversion Factor                                    | .063                        | .003       | .058                      | 19.292  | .000 |
|       | Zscore: Socioeconomic index                                    | .288                        | .004       | .258                      | 79.982  | .000 |
|       | ZFAC2_1XZBY_P801                                               | -.004                       | .003       | -.004                     | -1.259  | .208 |
|       | ZFAC2_1_sq                                                     | .021                        | .003       | .024                      | 7.951   | .000 |
|       | ZBY_P801_sq                                                    | .049                        | .003       | .057                      | 16.390  | .000 |
|       | BY_SEXefcode                                                   | -.145                       | .003       | -.133                     | -45.394 | .000 |
|       | BY_RACEwefcode                                                 | -.258                       | .007       | -.116                     | -37.215 | .000 |
|       | Zscore: Grade in which student was enrolled at time of testing | -.075                       | .003       | -.069                     | -22.811 | .000 |
|       | Zscore(IQ_comp_vms)                                            | .486                        | .004       | .436                      | 126.344 | .000 |
|       | ZIQ_comp_vms_sq                                                | .030                        | .003       | .032                      | 9.633   | .000 |
|       | ZIQ_comp_vmsXZBY_P801                                          | .036                        | .004       | .033                      | 8.657   | .000 |

**Coefficients<sup>a,b</sup>**

| Model                                                          |                                                                | 95.0% Confidence Interval for B |             |
|----------------------------------------------------------------|----------------------------------------------------------------|---------------------------------|-------------|
|                                                                |                                                                | Lower Bound                     | Upper Bound |
| 1                                                              | (Constant)                                                     | 2.742                           | 2.775       |
|                                                                | Zscore: Extraversion Factor                                    | .064                            | .078        |
|                                                                | Zscore: Socioeconomic index                                    | .452                            | .466        |
|                                                                | ZFAC2_1XZBY_P801                                               | -.033                           | -.019       |
|                                                                | ZFAC2_1_sq                                                     | .048                            | .059        |
|                                                                | ZBY_P801_sq                                                    | .075                            | .086        |
|                                                                | BY_SEXefcode                                                   | -.220                           | -.207       |
|                                                                | BY_RACEwefcode                                                 | -.118                           | -.089       |
|                                                                | Zscore: Grade in which student was enrolled at time of testing | .034                            | .048        |
|                                                                | 2                                                              | (Constant)                      | 2.881       |
| Zscore: Extraversion Factor                                    |                                                                | .057                            | .069        |
| Zscore: Socioeconomic index                                    |                                                                | .281                            | .296        |
| ZFAC2_1XZBY_P801                                               |                                                                | -.011                           | .002        |
| ZFAC2_1_sq                                                     |                                                                | .016                            | .026        |
| ZBY_P801_sq                                                    |                                                                | .043                            | .054        |
| BY_SEXefcode                                                   |                                                                | -.152                           | -.139       |
| BY_RACEwefcode                                                 |                                                                | -.272                           | -.245       |
| Zscore: Grade in which student was enrolled at time of testing |                                                                | -.081                           | -.068       |
| Zscore(IQ_comp_vms)                                            |                                                                | .478                            | .493        |
| ZIQ_comp_vms_sq                                                |                                                                | .024                            | .036        |
| ZIQ_comp_vmsXZBY_P801                                          |                                                                | .028                            | .044        |

a. Dependent Variable: Y11 Amount of Education (6 pt coding)

b. Weighted Least Squares Regression - Weighted by Eleven-year followup weight B

**Excluded Variables<sup>a,b</sup>**

| Model | Beta In               | t                 | Sig.    | Partial Correlation | Collinearity Statistics |      |
|-------|-----------------------|-------------------|---------|---------------------|-------------------------|------|
|       |                       |                   |         |                     | Tolerance               |      |
| 1     | Zscore(IQ_comp_vms)   | .444 <sup>c</sup> | 129.659 | .000                | .429                    | .708 |
|       | ZIQ_comp_vms_sq       | .090 <sup>c</sup> | 27.380  | .000                | .100                    | .933 |
|       | ZIQ_comp_vmsXZBY_P801 | .099 <sup>c</sup> | 26.148  | .000                | .095                    | .704 |

a. Dependent Variable: Y11 Amount of Education (6 pt coding)

b. Weighted Least Squares Regression - Weighted by Eleven-year followup weight B

c. Predictors in the Model: (Constant), Zscore: Grade in which student was enrolled at time of testing, BY\_SEXefcode, ZFAC2\_1XZBY\_P801, BY\_RACEwefcode, Zscore: Extraversion Factor, ZBY\_P801\_sq, Zscore: Socioeconomic index, ZFAC2\_1\_sq

**Coefficient Correlations<sup>a,b</sup>**

| Model |              | Zscore: Grade in which student was enrolled at time of testing | BY_SEXefcode | ZFAC2_1XZBY_P801 |             |
|-------|--------------|----------------------------------------------------------------|--------------|------------------|-------------|
| 1     | Correlations | Zscore: Grade in which student was enrolled at time of testing | 1.000        | -.004            | .026        |
|       |              | BY_SEXefcode                                                   | -.004        | 1.000            | -.004       |
|       |              | ZFAC2_1XZBY_P801                                               | .026         | -.004            | 1.000       |
|       |              | BY_RACEwefcode                                                 | -.033        | .044             | -.017       |
|       |              | Zscore: Extraversion Factor                                    | -.047        | -.013            | -.131       |
|       |              | ZBY_P801_sq                                                    | .038         | .025             | -.210       |
|       |              | Zscore: Socioeconomic index                                    | -.064        | .020             | .016        |
|       |              | ZFAC2_1_sq                                                     | -.028        | -.039            | -.237       |
|       | Covariances  | Zscore: Grade in which student was enrolled at time of testing | 1.216E-005   | -5.423E-008      | 3.317E-007  |
|       |              | BY_SEXefcode                                                   | -5.423E-008  | 1.224E-005       | -5.765E-008 |
|       |              | ZFAC2_1XZBY_P801                                               | 3.317E-007   | -5.765E-008      | 1.368E-005  |
|       |              | BY_RACEwefcode                                                 | -8.412E-007  | 1.152E-006       | -4.608E-007 |
|       |              | Zscore: Extraversion Factor                                    | -5.903E-007  | -1.597E-007      | -1.751E-006 |
|       |              | ZBY_P801_sq                                                    | 3.685E-007   | 2.469E-007       | -2.169E-006 |
|       |              | Zscore: Socioeconomic index                                    | -8.275E-007  | 2.629E-007       | 2.217E-007  |
|       |              | ZFAC2_1_sq                                                     | -2.796E-007  | -3.951E-007      | -2.537E-006 |

**Coefficient Correlations<sup>a,b</sup>**

| Model                       |              |                                                                | BY_RACEwef<br>code | Zscore:<br>Extraversion<br>Factor | ZBY_P801_sq |
|-----------------------------|--------------|----------------------------------------------------------------|--------------------|-----------------------------------|-------------|
| 1                           | Correlations | Zscore: Grade in which student was enrolled at time of testing | -.033              | -.047                             | .038        |
|                             |              | BY_SEXefcode                                                   | .044               | -.013                             | .025        |
|                             |              | ZFAC2_1XZBY_P801                                               | -.017              | -.131                             | -.210       |
|                             |              | BY_RACEwefcode                                                 | 1.000              | .005                              | .141        |
|                             |              | Zscore: Extraversion Factor                                    | .005               | 1.000                             | .014        |
|                             |              | ZBY_P801_sq                                                    | .141               | .014                              | 1.000       |
|                             |              | Zscore: Socioeconomic index                                    | -.211              | -.152                             | -.044       |
|                             |              | ZFAC2_1_sq                                                     | -.027              | -.137                             | .003        |
|                             | Covariances  | Zscore: Grade in which student was enrolled at time of testing | -8.412E-007        | -5.903E-007                       | 3.685E-007  |
|                             |              | BY_SEXefcode                                                   | 1.152E-006         | -1.597E-007                       | 2.469E-007  |
|                             |              | ZFAC2_1XZBY_P801                                               | -4.608E-007        | -1.751E-006                       | -2.169E-006 |
|                             |              | BY_RACEwefcode                                                 | 5.470E-005         | 1.277E-007                        | 2.918E-006  |
|                             |              | Zscore: Extraversion Factor                                    | 1.277E-007         | 1.305E-005                        | 1.443E-007  |
|                             |              | ZBY_P801_sq                                                    | 2.918E-006         | 1.443E-007                        | 7.818E-006  |
| Zscore: Socioeconomic index | -5.802E-006  | -2.044E-006                                                    | -4.565E-007        |                                   |             |
| ZFAC2_1_sq                  | -5.862E-007  | -1.430E-006                                                    | 2.718E-008         |                                   |             |

**Coefficient Correlations<sup>a,b</sup>**

| Model |              |                                                                      | Zscore:<br>Socioeconomic<br>index | ZFAC2_1_sq  | ZIQ_comp_v<br>ms_sq |
|-------|--------------|----------------------------------------------------------------------|-----------------------------------|-------------|---------------------|
| 1     | Correlations | Zscore: Grade in which<br>student was enrolled at<br>time of testing | -.064                             | -.028       |                     |
|       |              | BY_SEXefcode                                                         | .020                              | -.039       |                     |
|       |              | ZFAC2_1XZBY_P801                                                     | .016                              | -.237       |                     |
|       |              | BY_RACEwefcode                                                       | -.211                             | -.027       |                     |
|       |              | Zscore: Extraversion<br>Factor                                       | -.152                             | -.137       |                     |
|       |              | ZBY_P801_sq                                                          | -.044                             | .003        |                     |
|       |              | Zscore: Socioeconomic<br>index                                       | 1.000                             | -.069       |                     |
|       |              | ZFAC2_1_sq                                                           | -.069                             | 1.000       |                     |
|       | Covariances  | Zscore: Grade in which<br>student was enrolled at<br>time of testing | -8.275E-007                       | -2.796E-007 |                     |
|       |              | BY_SEXefcode                                                         | 2.629E-007                        | -3.951E-007 |                     |
|       |              | ZFAC2_1XZBY_P801                                                     | 2.217E-007                        | -2.537E-006 |                     |
|       |              | BY_RACEwefcode                                                       | -5.802E-006                       | -5.862E-007 |                     |
|       |              | Zscore: Extraversion<br>Factor                                       | -2.044E-006                       | -1.430E-006 |                     |
|       |              | ZBY_P801_sq                                                          | -4.565E-007                       | 2.718E-008  |                     |
|       |              | Zscore: Socioeconomic<br>index                                       | 1.386E-005                        | -7.424E-007 |                     |
|       |              | ZFAC2_1_sq                                                           | -7.424E-007                       | 8.364E-006  |                     |





**Coefficient Correlations<sup>a,b</sup>**

| Model                       |              | Zscore:<br>Grade in<br>which student<br>was enrolled<br>at time of<br>testing | BY_SEXefcod<br>e                                               | ZFAC2_1XZB<br>Y_P801 |             |            |            |
|-----------------------------|--------------|-------------------------------------------------------------------------------|----------------------------------------------------------------|----------------------|-------------|------------|------------|
| 2                           | Correlations | Zscore: Grade in which student was enrolled at time of testing                | 1.000                                                          | -.050                | .011        |            |            |
|                             |              | BY_SEXefcode                                                                  | -.050                                                          | 1.000                | .004        |            |            |
|                             |              | ZFAC2_1XZBY_P801                                                              | .011                                                           | .004                 | 1.000       |            |            |
|                             |              | BY_RACEwefcode                                                                | .016                                                           | .019                 | -.026       |            |            |
|                             |              | Zscore: Extraversion Factor                                                   | -.040                                                          | -.015                | -.132       |            |            |
|                             |              | ZBY_P801_sq                                                                   | .031                                                           | .027                 | -.180       |            |            |
|                             |              | Zscore: Socioeconomic index                                                   | .042                                                           | -.042                | -.003       |            |            |
|                             |              | ZFAC2_1_sq                                                                    | -.001                                                          | -.053                | -.240       |            |            |
|                             |              | ZIQ_comp_vms_sq                                                               | -.050                                                          | .060                 | .002        |            |            |
|                             |              | Zscore(IQ_comp_vms)                                                           | -.263                                                          | .155                 | .050        |            |            |
|                             |              | ZIQ_comp_vmsXZBY_P801                                                         | .028                                                           | -.033                | -.001       |            |            |
|                             |              | Covariances                                                                   | Zscore: Grade in which student was enrolled at time of testing | 1.069E-005           | -5.275E-007 | 1.212E-007 |            |
|                             |              |                                                                               |                                                                | BY_SEXefcode         | -5.275E-007 | 1.026E-005 | 4.041E-008 |
|                             |              |                                                                               |                                                                | ZFAC2_1XZBY_P801     | 1.212E-007  | 4.041E-008 | 1.115E-005 |
| BY_RACEwefcode              | 3.608E-007   |                                                                               |                                                                | 4.198E-007           | -5.959E-007 |            |            |
| Zscore: Extraversion Factor | -4.235E-007  |                                                                               |                                                                | -1.542E-007          | -1.436E-006 |            |            |
| ZBY_P801_sq                 | 2.983E-007   |                                                                               |                                                                | 2.530E-007           | -1.779E-006 |            |            |
| Zscore: Socioeconomic index | 5.011E-007   |                                                                               |                                                                | -4.832E-007          | -4.047E-008 |            |            |
| ZFAC2_1_sq                  | -1.271E-008  |                                                                               |                                                                | -4.446E-007          | -2.104E-006 |            |            |
| ZIQ_comp_vms_sq             | -5.047E-007  |                                                                               |                                                                | 5.966E-007           | 1.940E-008  |            |            |
| Zscore(IQ_comp_vms)         | -3.310E-006  |                                                                               |                                                                | 1.909E-006           | 6.362E-007  |            |            |
| ZIQ_comp_vmsXZBY_P801       | 3.807E-007   |                                                                               |                                                                | -4.451E-007          | -8.767E-009 |            |            |

**Coefficient Correlations<sup>a,b</sup>**

| Model |              |                                                                | BY_RACEwef<br>code | Zscore:<br>Extraversion<br>Factor | ZBY_P801_sq |
|-------|--------------|----------------------------------------------------------------|--------------------|-----------------------------------|-------------|
| 2     | Correlations | Zscore: Grade in which student was enrolled at time of testing | .016               | -.040                             | .031        |
|       |              | BY_SEXefcode                                                   | .019               | -.015                             | .027        |
|       |              | ZFAC2_1XZBY_P801                                               | -.026              | -.132                             | -.180       |
|       |              | BY_RACEwefcode                                                 | 1.000              | .018                              | .076        |
|       |              | Zscore: Extraversion Factor                                    | .018               | 1.000                             | .001        |
|       |              | ZBY_P801_sq                                                    | .076               | .001                              | 1.000       |
|       |              | Zscore: Socioeconomic index                                    | -.119              | -.133                             | -.037       |
|       |              | ZFAC2_1_sq                                                     | -.009              | -.134                             | .016        |
|       |              | ZIQ_comp_vms_sq                                                | .154               | .031                              | .113        |
|       |              | Zscore(IQ_comp_vms)                                            | -.220              | -.030                             | .016        |
|       |              | ZIQ_comp_vmsXZBY_P801                                          | .044               | .013                              | -.511       |
|       | Covariances  | Zscore: Grade in which student was enrolled at time of testing | 3.608E-007         | -4.235E-007                       | 2.983E-007  |
|       |              | BY_SEXefcode                                                   | 4.198E-007         | -1.542E-007                       | 2.530E-007  |
|       |              | ZFAC2_1XZBY_P801                                               | -5.959E-007        | -1.436E-006                       | -1.779E-006 |
|       |              | BY_RACEwefcode                                                 | 4.822E-005         | 4.032E-007                        | 1.561E-006  |
|       |              | Zscore: Extraversion Factor                                    | 4.032E-007         | 1.063E-005                        | 1.285E-008  |
|       |              | ZBY_P801_sq                                                    | 1.561E-006         | 1.285E-008                        | 8.792E-006  |
|       |              | Zscore: Socioeconomic index                                    | -2.978E-006        | -1.560E-006                       | -3.931E-007 |
|       |              | ZFAC2_1_sq                                                     | -1.633E-007        | -1.146E-006                       | 1.219E-007  |
|       |              | ZIQ_comp_vms_sq                                                | 3.331E-006         | 3.116E-007                        | 1.038E-006  |
|       |              | Zscore(IQ_comp_vms)                                            | -5.881E-006        | -3.765E-007                       | 1.773E-007  |
|       |              | ZIQ_comp_vmsXZBY_P801                                          | 1.273E-006         | 1.777E-007                        | -6.295E-006 |

**Coefficient Correlations<sup>a,b</sup>**

| Model                       |              |                                                                | Zscore:<br>Socioeconomic<br>index                              | ZFAC2_1_sq  | ZIQ_comp_v<br>ms_sq |             |
|-----------------------------|--------------|----------------------------------------------------------------|----------------------------------------------------------------|-------------|---------------------|-------------|
| 2                           | Correlations | Zscore: Grade in which student was enrolled at time of testing | .042                                                           | -.001       | -.050               |             |
|                             |              | BY_SEXefcode                                                   | -.042                                                          | -.053       | .060                |             |
|                             |              | ZFAC2_1XZBY_P801                                               | -.003                                                          | -.240       | .002                |             |
|                             |              | BY_RACEwefcode                                                 | -.119                                                          | -.009       | .154                |             |
|                             |              | Zscore: Extraversion Factor                                    | -.133                                                          | -.134       | .031                |             |
|                             |              | ZBY_P801_sq                                                    | -.037                                                          | .016        | .113                |             |
|                             |              | Zscore: Socioeconomic index                                    | 1.000                                                          | -.030       | -.030               |             |
|                             |              | ZFAC2_1_sq                                                     | -.030                                                          | 1.000       | .005                |             |
|                             |              | ZIQ_comp_vms_sq                                                | -.030                                                          | .005        | 1.000               |             |
|                             |              | Zscore(IQ_comp_vms)                                            | -.361                                                          | -.092       | -.077               |             |
|                             |              | ZIQ_comp_vmsXZBY_P801                                          | .032                                                           | -.018       | -.435               |             |
|                             |              | Covariances                                                    | Zscore: Grade in which student was enrolled at time of testing | 5.011E-007  | -1.271E-008         | -5.047E-007 |
|                             |              |                                                                | BY_SEXefcode                                                   | -4.832E-007 | -4.446E-007         | 5.966E-007  |
| ZFAC2_1XZBY_P801            | -4.047E-008  |                                                                | -2.104E-006                                                    | 1.940E-008  |                     |             |
| BY_RACEwefcode              | -2.978E-006  |                                                                | -1.633E-007                                                    | 3.331E-006  |                     |             |
| Zscore: Extraversion Factor | -1.560E-006  |                                                                | -1.146E-006                                                    | 3.116E-007  |                     |             |
| ZBY_P801_sq                 | -3.931E-007  |                                                                | 1.219E-007                                                     | 1.038E-006  |                     |             |
| Zscore: Socioeconomic index | 1.301E-005   |                                                                | -2.834E-007                                                    | -3.386E-007 |                     |             |
| ZFAC2_1_sq                  | -2.834E-007  |                                                                | 6.863E-006                                                     | 4.348E-008  |                     |             |
| ZIQ_comp_vms_sq             | -3.386E-007  |                                                                | 4.348E-008                                                     | 9.644E-006  |                     |             |
| Zscore(IQ_comp_vms)         | -4.998E-006  |                                                                | -9.277E-007                                                    | -9.212E-007 |                     |             |
| ZIQ_comp_vmsXZBY_P801       | 4.861E-007   |                                                                | -1.980E-007                                                    | -5.617E-006 |                     |             |

**Coefficient Correlations<sup>a,b</sup>**

| Model |              |                                                                | Zscore<br>(IQ_comp_vms) | ZIQ_comp_vmsXZBY_P801 |
|-------|--------------|----------------------------------------------------------------|-------------------------|-----------------------|
| 2     | Correlations | Zscore: Grade in which student was enrolled at time of testing | -.263                   | .028                  |
|       |              | BY_SEXefcode                                                   | .155                    | -.033                 |
|       |              | ZFAC2_1XZBY_P801                                               | .050                    | -.001                 |
|       |              | BY_RACEwefcode                                                 | -.220                   | .044                  |
|       |              | Zscore: Extraversion Factor                                    | -.030                   | .013                  |
|       |              | ZBY_P801_sq                                                    | .016                    | -.511                 |
|       |              | Zscore: Socioeconomic index                                    | -.361                   | .032                  |
|       |              | ZFAC2_1_sq                                                     | -.092                   | -.018                 |
|       |              | ZIQ_comp_vms_sq                                                | -.077                   | -.435                 |
|       |              | Zscore(IQ_comp_vms)                                            | 1.000                   | -.068                 |
|       |              | ZIQ_comp_vmsXZBY_P801                                          | -.068                   | 1.000                 |
|       | Covariances  | Zscore: Grade in which student was enrolled at time of testing | -3.310E-006             | 3.807E-007            |
|       |              | BY_SEXefcode                                                   | 1.909E-006              | -4.451E-007           |
|       |              | ZFAC2_1XZBY_P801                                               | 6.362E-007              | -8.767E-009           |
|       |              | BY_RACEwefcode                                                 | -5.881E-006             | 1.273E-006            |
|       |              | Zscore: Extraversion Factor                                    | -3.765E-007             | 1.777E-007            |
|       |              | ZBY_P801_sq                                                    | 1.773E-007              | -6.295E-006           |
|       |              | Zscore: Socioeconomic index                                    | -4.998E-006             | 4.861E-007            |
|       |              | ZFAC2_1_sq                                                     | -9.277E-007             | -1.980E-007           |
|       |              | ZIQ_comp_vms_sq                                                | -9.212E-007             | -5.617E-006           |
|       |              | Zscore(IQ_comp_vms)                                            | 1.477E-005              | -1.084E-006           |
|       |              | ZIQ_comp_vmsXZBY_P801                                          | -1.084E-006             | 1.726E-005            |

a. Dependent Variable: Y11 Amount of Education (6 pt coding)

b. Weighted Least Squares Regression - Weighted by Eleven-year followup weight B

REGRESSION

/MISSING LISTWISE

/REGWGT=Y11\_WTB

```

/STATISTICS COEFF OUTS CI(95) R ANOVA BCOV CHANGE
/CRITERIA=PIN(.05) POUT(.10)
/NOORIGIN
/DEPENDENT ln_Y11_O221
/METHOD=ENTER ZFAC2_1 ZBY_P801 ZFAC2_1XZBY_P801 ZFAC2_1_sq ZBY_P801_sq BY_S
EXefcode BY_RACEwefcode ZBY_TESTGRD
/METHOD=ENTER ZIQ_comp_vms ZIQ_comp_vms_sq ZIQ_comp_vmsXZBY_P801.

```

## Regression

[DataSet1] C:\Users\ridamian\Dropbox\PT\PT Paper\PT base year and follow up 1  
1-18-11\_Rodica2\_credible only\_1\_used for paper\_20.sav

**Variables Entered/Removed<sup>a,b</sup>**

| Model | Variables Entered                                                                                                                                                                                                                                                         | Variables Removed | Method |
|-------|---------------------------------------------------------------------------------------------------------------------------------------------------------------------------------------------------------------------------------------------------------------------------|-------------------|--------|
| 1     | Zscore:<br>Grade in<br>which student<br>was enrolled<br>at time of<br>testing,<br>ZFAC2_1XZB<br>Y_P801,<br>BY_SEXefcod<br>e, Zscore:<br>Socioeconomi<br>c index,<br>ZBY_P801_sq<br>, Zscore:<br>Extraversion<br>Factor,<br>BY_RACEwef<br>code,<br>ZFAC2_1_sq <sup>c</sup> |                   | Enter  |
| 2     | ZIQ_comp_v<br>ms_sq,<br>Zscore<br>(IQ_comp_vm<br>s),<br>ZIQ_comp_v<br>msXZBY_P80<br>1 <sup>c</sup>                                                                                                                                                                        |                   | Enter  |

- a. Dependent Variable: Estimated annual earnings on current job (natural logarithm)
- b. Weighted Least Squares Regression - Weighted by Eleven-year followup weight B
- c. All requested variables entered.

**Model Summary**

| Model | R                 | R Square | Adjusted R Square | Std. Error of the Estimate | Change Statistics |          |     |
|-------|-------------------|----------|-------------------|----------------------------|-------------------|----------|-----|
|       |                   |          |                   |                            | R Square Change   | F Change | df1 |
| 1     | .551 <sup>a</sup> | .303     | .303              | 14.07259                   | .303              | 2911.142 | 8   |
| 2     | .555 <sup>b</sup> | .308     | .308              | 14.02037                   | .005              | 134.100  | 3   |

**Model Summary**

| Model | Change Statistics |               |
|-------|-------------------|---------------|
|       | df2               | Sig. F Change |
| 1     | 53507             | .000          |
| 2     | 53504             | .000          |

- a. Predictors: (Constant), Zscore: Grade in which student was enrolled at time of testing, ZFAC2\_1XZBY\_P801, BY\_SEXefcode, Zscore: Socioeconomic index, ZBY\_P801\_sq, Zscore: Extraversion Factor, BY\_RACEwefcode, ZFAC2\_1\_sq
- b. Predictors: (Constant), Zscore: Grade in which student was enrolled at time of testing, ZFAC2\_1XZBY\_P801, BY\_SEXefcode, Zscore: Socioeconomic index, ZBY\_P801\_sq, Zscore: Extraversion Factor, BY\_RACEwefcode, ZFAC2\_1\_sq, ZIQ\_comp\_vms\_sq, Zscore(IQ\_comp\_vms), ZIQ\_comp\_vmsXZBY\_P801

**ANOVA<sup>a,b</sup>**

| Model |            | Sum of Squares | df    | Mean Square | F        | Sig.              |
|-------|------------|----------------|-------|-------------|----------|-------------------|
| 1     | Regression | 4612126.416    | 8     | 576515.802  | 2911.142 | .000 <sup>c</sup> |
|       | Residual   | 10596403.63    | 53507 | 198.038     |          |                   |
|       | Total      | 15208530.04    | 53515 |             |          |                   |
| 2     | Regression | 4691206.837    | 11    | 426473.349  | 2169.566 | .000 <sup>d</sup> |
|       | Residual   | 10517323.21    | 53504 | 196.571     |          |                   |
|       | Total      | 15208530.04    | 53515 |             |          |                   |

- a. Dependent Variable: Estimated annual earnings on current job (natural logarithm)
- b. Weighted Least Squares Regression - Weighted by Eleven-year followup weight B
- c. Predictors: (Constant), Zscore: Grade in which student was enrolled at time of testing, ZFAC2\_1XZBY\_P801, BY\_SEXefcode, Zscore: Socioeconomic index, ZBY\_P801\_sq, Zscore: Extraversion Factor, BY\_RACEwefcode, ZFAC2\_1\_sq
- d. Predictors: (Constant), Zscore: Grade in which student was enrolled at time of testing, ZFAC2\_1XZBY\_P801, BY\_SEXefcode, Zscore: Socioeconomic index, ZBY\_P801\_sq, Zscore: Extraversion Factor, BY\_RACEwefcode, ZFAC2\_1\_sq, ZIQ\_comp\_vms\_sq, Zscore(IQ\_comp\_vms), ZIQ\_comp\_vmsXZBY\_P801

**Coefficients<sup>a,b</sup>**

| Model |                                                                | Unstandardized Coefficients |            | Standardized Coefficients | t        | Sig. |
|-------|----------------------------------------------------------------|-----------------------------|------------|---------------------------|----------|------|
|       |                                                                | B                           | Std. Error | Beta                      |          |      |
| 1     | (Constant)                                                     | 9.008                       | .005       |                           | 1784.047 | .000 |
|       | Zscore: Extraversion Factor                                    | .031                        | .002       | .052                      | 13.698   | .000 |
|       | Zscore: Socioeconomic index                                    | .072                        | .002       | .119                      | 31.498   | .000 |
|       | ZFAC2_1XZBY_P801                                               | -.005                       | .002       | -.008                     | -2.187   | .029 |
|       | ZFAC2_1_sq                                                     | .002                        | .002       | .005                      | 1.329    | .184 |
|       | ZBY_P801_sq                                                    | .001                        | .002       | .002                      | .450     | .653 |
|       | BY_SEXefcode                                                   | -.330                       | .002       | -.528                     | -144.819 | .000 |
|       | BY_RACEwefcode                                                 | -.022                       | .004       | -.019                     | -5.057   | .000 |
|       | Zscore: Grade in which student was enrolled at time of testing | -.070                       | .002       | -.117                     | -32.116  | .000 |
| 2     | (Constant)                                                     | 9.024                       | .006       |                           | 1596.330 | .000 |
|       | Zscore: Extraversion Factor                                    | .030                        | .002       | .050                      | 13.224   | .000 |
|       | Zscore: Socioeconomic index                                    | .056                        | .002       | .092                      | 22.580   | .000 |
|       | ZFAC2_1XZBY_P801                                               | -.003                       | .002       | -.005                     | -1.281   | .200 |
|       | ZFAC2_1_sq                                                     | -.001                       | .002       | -.001                     | -.339    | .735 |
|       | ZBY_P801_sq                                                    | .005                        | .002       | .011                      | 2.481    | .013 |
|       | BY_SEXefcode                                                   | -.325                       | .002       | -.519                     | -141.679 | .000 |
|       | BY_RACEwefcode                                                 | -.042                       | .005       | -.036                     | -9.135   | .000 |
|       | Zscore: Grade in which student was enrolled at time of testing | -.083                       | .002       | -.137                     | -36.316  | .000 |
|       | Zscore(IQ_comp_vms)                                            | .050                        | .003       | .084                      | 19.262   | .000 |
|       | ZIQ_comp_vms_sq                                                | .003                        | .002       | .006                      | 1.323    | .186 |
|       | ZIQ_comp_vmsXZBY_P801                                          | -.014                       | .003       | -.024                     | -4.991   | .000 |

**Coefficients<sup>a,b</sup>**

| Model                                                          |                                                                | 95.0% Confidence Interval for B |             |
|----------------------------------------------------------------|----------------------------------------------------------------|---------------------------------|-------------|
|                                                                |                                                                | Lower Bound                     | Upper Bound |
| 1                                                              | (Constant)                                                     | 8.998                           | 9.018       |
|                                                                | Zscore: Extraversion Factor                                    | .026                            | .035        |
|                                                                | Zscore: Socioeconomic index                                    | .068                            | .077        |
|                                                                | ZFAC2_1XZBY_P801                                               | -.009                           | -.001       |
|                                                                | ZFAC2_1_sq                                                     | -.001                           | .006        |
|                                                                | ZBY_P801_sq                                                    | -.003                           | .004        |
|                                                                | BY_SEXefcode                                                   | -.335                           | -.326       |
|                                                                | BY_RACEwefcode                                                 | -.031                           | -.014       |
|                                                                | Zscore: Grade in which student was enrolled at time of testing | -.075                           | -.066       |
|                                                                | 2                                                              | (Constant)                      | 9.013       |
| Zscore: Extraversion Factor                                    |                                                                | .025                            | .034        |
| Zscore: Socioeconomic index                                    |                                                                | .051                            | .060        |
| ZFAC2_1XZBY_P801                                               |                                                                | -.007                           | .002        |
| ZFAC2_1_sq                                                     |                                                                | -.004                           | .003        |
| ZBY_P801_sq                                                    |                                                                | .001                            | .009        |
| BY_SEXefcode                                                   |                                                                | -.329                           | -.320       |
| BY_RACEwefcode                                                 |                                                                | -.051                           | -.033       |
| Zscore: Grade in which student was enrolled at time of testing |                                                                | -.087                           | -.078       |
| Zscore(IQ_comp_vms)                                            |                                                                | .045                            | .056        |
| ZIQ_comp_vms_sq                                                |                                                                | -.001                           | .007        |
| ZIQ_comp_vmsXZBY_P801                                          |                                                                | -.019                           | -.008       |

a. Dependent Variable: Estimated annual earnings on current job (natural logarithm)

b. Weighted Least Squares Regression - Weighted by Eleven-year followup weight B



**Excluded Variables<sup>a,b</sup>**

| Model |                       | Beta In            | t      | Sig. | Partial Correlation | Collinearity Statistics |
|-------|-----------------------|--------------------|--------|------|---------------------|-------------------------|
|       |                       |                    |        |      |                     | Tolerance               |
| 1     | Zscore(IQ_comp_vms)   | .083 <sup>c</sup>  | 19.394 | .000 | .084                | .705                    |
|       | ZIQ_comp_vms_sq       | .010 <sup>c</sup>  | 2.573  | .010 | .011                | .930                    |
|       | ZIQ_comp_vmsXZBY_P801 | -.014 <sup>c</sup> | -3.213 | .001 | -.014               | .701                    |

- a. Dependent Variable: Estimated annual earnings on current job (natural logarithm)
- b. Weighted Least Squares Regression - Weighted by Eleven-year followup weight B
- c. Predictors in the Model: (Constant), Zscore: Grade in which student was enrolled at time of testing, ZFAC2\_1XZBY\_P801, BY\_SEXefcode, Zscore: Socioeconomic index, ZBY\_P801\_sq, Zscore: Extraversion Factor, BY\_RACEwefcode, ZFAC2\_1\_sq

**Coefficient Correlations<sup>a,b</sup>**

| Model |              | Zscore: Grade in which student was enrolled at time of testing | ZFAC2_1XZBY_P801 | BY_SEXefcode |             |
|-------|--------------|----------------------------------------------------------------|------------------|--------------|-------------|
| 1     | Correlations | Zscore: Grade in which student was enrolled at time of testing | 1.000            | .021         | .023        |
|       |              | ZFAC2_1XZBY_P801                                               | .021             | 1.000        | .005        |
|       |              | BY_SEXefcode                                                   | .023             | .005         | 1.000       |
|       |              | Zscore: Socioeconomic index                                    | -.063            | -.004        | .000        |
|       |              | ZBY_P801_sq                                                    | .047             | -.179        | .010        |
|       |              | Zscore: Extraversion Factor                                    | -.057            | -.137        | -.018       |
|       |              | BY_RACEwefcode                                                 | -.026            | -.006        | .125        |
|       |              | ZFAC2_1_sq                                                     | -.023            | -.225        | -.054       |
|       | Covariances  | Zscore: Grade in which student was enrolled at time of testing | 4.803E-006       | 1.039E-007   | 1.137E-007  |
|       |              | ZFAC2_1XZBY_P801                                               | 1.039E-007       | 5.226E-006   | 2.650E-008  |
|       |              | BY_SEXefcode                                                   | 1.137E-007       | 2.650E-008   | 5.207E-006  |
|       |              | Zscore: Socioeconomic index                                    | -3.171E-007      | -2.128E-008  | -1.454E-010 |
|       |              | ZBY_P801_sq                                                    | 1.757E-007       | -6.978E-007  | 3.849E-008  |
|       |              | Zscore: Extraversion Factor                                    | -2.834E-007      | -7.088E-007  | -9.366E-008 |
|       |              | BY_RACEwefcode                                                 | -2.464E-007      | -5.616E-008  | 1.252E-006  |
|       |              | ZFAC2_1_sq                                                     | -9.239E-008      | -9.411E-007  | -2.265E-007 |

**Coefficient Correlations<sup>a,b</sup>**

| Model |              |                                                                | Zscore:<br>Socioeconomic index | ZBY_P801_sq | Zscore:<br>Extraversion Factor |
|-------|--------------|----------------------------------------------------------------|--------------------------------|-------------|--------------------------------|
| 1     | Correlations | Zscore: Grade in which student was enrolled at time of testing | -.063                          | .047        | -.057                          |
|       |              | ZFAC2_1XZBY_P801                                               | -.004                          | -.179       | -.137                          |
|       |              | BY_SEXefcode                                                   | .000                           | .010        | -.018                          |
|       |              | Zscore: Socioeconomic index                                    | 1.000                          | -.036       | -.135                          |
|       |              | ZBY_P801_sq                                                    | -.036                          | 1.000       | .006                           |
|       |              | Zscore: Extraversion Factor                                    | -.135                          | .006        | 1.000                          |
|       |              | BY_RACEwefcode                                                 | -.225                          | .142        | -.003                          |
|       |              | ZFAC2_1_sq                                                     | -.070                          | .001        | -.139                          |
|       | Covariances  | Zscore: Grade in which student was enrolled at time of testing | -3.171E-007                    | 1.757E-007  | -2.834E-007                    |
|       |              | ZFAC2_1XZBY_P801                                               | -2.128E-008                    | -6.978E-007 | -7.088E-007                    |
|       |              | BY_SEXefcode                                                   | -1.454E-010                    | 3.849E-008  | -9.366E-008                    |
|       |              | Zscore: Socioeconomic index                                    | 5.271E-006                     | -1.390E-007 | -6.999E-007                    |
|       |              | ZBY_P801_sq                                                    | -1.390E-007                    | 2.893E-006  | 2.493E-008                     |
|       |              | Zscore: Extraversion Factor                                    | -6.999E-007                    | 2.493E-008  | 5.096E-006                     |
|       |              | BY_RACEwefcode                                                 | -2.273E-006                    | 1.063E-006  | -2.481E-008                    |
|       |              | ZFAC2_1_sq                                                     | -2.933E-007                    | 3.484E-009  | -5.723E-007                    |

**Coefficient Correlations<sup>a,b</sup>**

| Model |              |                                                                | BY_RACEwef<br>code | ZFAC2_1_sq  | ZIQ_comp_v<br>ms_sq |
|-------|--------------|----------------------------------------------------------------|--------------------|-------------|---------------------|
| 1     | Correlations | Zscore: Grade in which student was enrolled at time of testing | -.026              | -.023       |                     |
|       |              | ZFAC2_1XZBY_P801                                               | -.006              | -.225       |                     |
|       |              | BY_SEXefcode                                                   | .125               | -.054       |                     |
|       |              | Zscore: Socioeconomic index                                    | -.225              | -.070       |                     |
|       |              | ZBY_P801_sq                                                    | .142               | .001        |                     |
|       |              | Zscore: Extraversion Factor                                    | -.003              | -.139       |                     |
|       |              | BY_RACEwefcode                                                 | 1.000              | -.033       |                     |
|       |              | ZFAC2_1_sq                                                     | -.033              | 1.000       |                     |
|       | Covariances  | Zscore: Grade in which student was enrolled at time of testing | -2.464E-007        | -9.239E-008 |                     |
|       |              | ZFAC2_1XZBY_P801                                               | -5.616E-008        | -9.411E-007 |                     |
|       |              | BY_SEXefcode                                                   | 1.252E-006         | -2.265E-007 |                     |
|       |              | Zscore: Socioeconomic index                                    | -2.273E-006        | -2.933E-007 |                     |
|       |              | ZBY_P801_sq                                                    | 1.063E-006         | 3.484E-009  |                     |
|       |              | Zscore: Extraversion Factor                                    | -2.481E-008        | -5.723E-007 |                     |
|       |              | BY_RACEwefcode                                                 | 1.931E-005         | -2.665E-007 |                     |
|       |              | ZFAC2_1_sq                                                     | -2.665E-007        | 3.335E-006  |                     |

**Coefficient Correlations<sup>a,b</sup>**

| Model                                                                                                                                                                                                                                    | Zscore<br>(IQ_comp_vms) | ZIQ_comp_vmsXZBY_P801 |
|------------------------------------------------------------------------------------------------------------------------------------------------------------------------------------------------------------------------------------------|-------------------------|-----------------------|
| 1      Correlations      Zscore: Grade in which student was enrolled at time of testing<br>ZFAC2_1XZBY_P801<br>BY_SEXefcode<br>Zscore: Socioeconomic index<br>ZBY_P801_sq<br>Zscore: Extraversion Factor<br>BY_RACEwefcode<br>ZFAC2_1_sq |                         |                       |
| Covariances      Zscore: Grade in which student was enrolled at time of testing<br>ZFAC2_1XZBY_P801<br>BY_SEXefcode<br>Zscore: Socioeconomic index<br>ZBY_P801_sq<br>Zscore: Extraversion Factor<br>BY_RACEwefcode<br>ZFAC2_1_sq         |                         |                       |

**Coefficient Correlations<sup>a,b</sup>**

| Model                       |              | Zscore:<br>Grade in<br>which student<br>was enrolled<br>at time of<br>testing | ZFAC2_1XZB<br>Y_P801                                           | BY_SEXefcod<br>e |            |             |
|-----------------------------|--------------|-------------------------------------------------------------------------------|----------------------------------------------------------------|------------------|------------|-------------|
| 2                           | Correlations | Zscore: Grade in which student was enrolled at time of testing                | 1.000                                                          | .008             | -.015      |             |
|                             |              | ZFAC2_1XZBY_P801                                                              | .008                                                           | 1.000            | .010       |             |
|                             |              | BY_SEXefcode                                                                  | -.015                                                          | .010             | 1.000      |             |
|                             |              | Zscore: Socioeconomic index                                                   | .045                                                           | -.021            | -.044      |             |
|                             |              | ZBY_P801_sq                                                                   | .045                                                           | -.153            | .009       |             |
|                             |              | Zscore: Extraversion Factor                                                   | -.050                                                          | -.138            | -.020      |             |
|                             |              | BY_RACEwefcode                                                                | .020                                                           | -.017            | .101       |             |
|                             |              | ZFAC2_1_sq                                                                    | .003                                                           | -.228            | -.064      |             |
|                             |              | ZIQ_comp_vms_sq                                                               | -.059                                                          | -.011            | .043       |             |
|                             |              | Zscore(IQ_comp_vms)                                                           | -.262                                                          | .048             | .114       |             |
|                             |              | ZIQ_comp_vmsXZBY_P801                                                         | .017                                                           | .000             | -.018      |             |
|                             |              | Covariances                                                                   | Zscore: Grade in which student was enrolled at time of testing | 5.185E-006       | 3.971E-008 | -7.891E-008 |
|                             |              |                                                                               | ZFAC2_1XZBY_P801                                               | 3.971E-008       | 5.199E-006 | 5.374E-008  |
|                             |              |                                                                               | BY_SEXefcode                                                   | -7.891E-008      | 5.374E-008 | 5.258E-006  |
| Zscore: Socioeconomic index | 2.519E-007   |                                                                               | -1.159E-007                                                    | -2.508E-007      |            |             |
| ZBY_P801_sq                 | 2.052E-007   |                                                                               | -6.932E-007                                                    | 4.061E-008       |            |             |
| Zscore: Extraversion Factor | -2.565E-007  |                                                                               | -7.096E-007                                                    | -1.037E-007      |            |             |
| BY_RACEwefcode              | 2.125E-007   |                                                                               | -1.759E-007                                                    | 1.063E-006       |            |             |
| ZFAC2_1_sq                  | 1.204E-008   |                                                                               | -9.520E-007                                                    | -2.701E-007      |            |             |
| ZIQ_comp_vms_sq             | -2.808E-007  |                                                                               | -5.145E-008                                                    | 2.079E-007       |            |             |
| Zscore(IQ_comp_vms)         | -1.561E-006  |                                                                               | 2.855E-007                                                     | 6.822E-007       |            |             |
| ZIQ_comp_vmsXZBY_P801       | 1.070E-007   |                                                                               | 2.674E-009                                                     | -1.140E-007      |            |             |

**Coefficient Correlations<sup>a,b</sup>**

| Model |              |                                                                | Zscore:<br>Socioeconomic<br>index | ZBY_P801_sq | Zscore:<br>Extraversion<br>Factor |
|-------|--------------|----------------------------------------------------------------|-----------------------------------|-------------|-----------------------------------|
| 2     | Correlations | Zscore: Grade in which student was enrolled at time of testing | .045                              | .045        | -.050                             |
|       |              | ZFAC2_1XZBY_P801                                               | -.021                             | -.153       | -.138                             |
|       |              | BY_SEXefcode                                                   | -.044                             | .009        | -.020                             |
|       |              | Zscore: Socioeconomic index                                    | 1.000                             | .014        | -.119                             |
|       |              | ZBY_P801_sq                                                    | .014                              | 1.000       | -.006                             |
|       |              | Zscore: Extraversion Factor                                    | -.119                             | -.006       | 1.000                             |
|       |              | BY_RACEwefcode                                                 | -.133                             | .073        | .007                              |
|       |              | ZFAC2_1_sq                                                     | -.030                             | .015        | -.137                             |
|       |              | ZIQ_comp_vms_sq                                                | .017                              | .120        | .009                              |
|       |              | Zscore(IQ_comp_vms)                                            | -.357                             | -.005       | -.024                             |
|       |              | ZIQ_comp_vmsXZBY_P801                                          | -.059                             | -.510       | .020                              |
|       | Covariances  | Zscore: Grade in which student was enrolled at time of testing | 2.519E-007                        | 2.052E-007  | -2.565E-007                       |
|       |              | ZFAC2_1XZBY_P801                                               | -1.159E-007                       | -6.932E-007 | -7.096E-007                       |
|       |              | BY_SEXefcode                                                   | -2.508E-007                       | 4.061E-008  | -1.037E-007                       |
|       |              | Zscore: Socioeconomic index                                    | 6.064E-006                        | 6.900E-008  | -6.607E-007                       |
|       |              | ZBY_P801_sq                                                    | 6.900E-008                        | 3.966E-006  | -2.874E-008                       |
|       |              | Zscore: Extraversion Factor                                    | -6.607E-007                       | -2.874E-008 | 5.065E-006                        |
|       |              | BY_RACEwefcode                                                 | -1.501E-006                       | 6.619E-007  | 6.892E-008                        |
|       |              | ZFAC2_1_sq                                                     | -1.349E-007                       | 5.338E-008  | -5.619E-007                       |
|       |              | ZIQ_comp_vms_sq                                                | 8.860E-008                        | 5.013E-007  | 4.416E-008                        |
|       |              | Zscore(IQ_comp_vms)                                            | -2.301E-006                       | -2.785E-008 | -1.413E-007                       |
|       |              | ZIQ_comp_vmsXZBY_P801                                          | -4.058E-007                       | -2.839E-006 | 1.237E-007                        |

**Coefficient Correlations<sup>a,b</sup>**

| Model                       |              |                                                                | BY_RACEwef<br>code                                             | ZFAC2_1_sq                                                     | ZIQ_comp_v<br>ms_sq |             |             |
|-----------------------------|--------------|----------------------------------------------------------------|----------------------------------------------------------------|----------------------------------------------------------------|---------------------|-------------|-------------|
| 2                           | Correlations | Zscore: Grade in which student was enrolled at time of testing | .020                                                           | .003                                                           | -.059               |             |             |
|                             |              | ZFAC2_1XZBY_P801                                               | -.017                                                          | -.228                                                          | -.011               |             |             |
|                             |              | BY_SEXefcode                                                   | .101                                                           | -.064                                                          | .043                |             |             |
|                             |              | Zscore: Socioeconomic index                                    | -.133                                                          | -.030                                                          | .017                |             |             |
|                             |              | ZBY_P801_sq                                                    | .073                                                           | .015                                                           | .120                |             |             |
|                             |              | Zscore: Extraversion Factor                                    | .007                                                           | -.137                                                          | .009                |             |             |
|                             |              | BY_RACEwefcode                                                 | 1.000                                                          | -.014                                                          | .159                |             |             |
|                             |              | ZFAC2_1_sq                                                     | -.014                                                          | 1.000                                                          | .011                |             |             |
|                             |              | ZIQ_comp_vms_sq                                                | .159                                                           | .011                                                           | 1.000               |             |             |
|                             |              | Zscore(IQ_comp_vms)                                            | -.231                                                          | -.090                                                          | -.165               |             |             |
|                             |              | ZIQ_comp_vmsXZBY_P801                                          | .047                                                           | -.022                                                          | -.452               |             |             |
|                             |              | Covariances                                                    | Zscore: Grade in which student was enrolled at time of testing | Zscore: Grade in which student was enrolled at time of testing | 2.125E-007          | 1.204E-008  | -2.808E-007 |
|                             |              |                                                                |                                                                | ZFAC2_1XZBY_P801                                               | -1.759E-007         | -9.520E-007 | -5.145E-008 |
| BY_SEXefcode                | 1.063E-006   |                                                                |                                                                | -2.701E-007                                                    | 2.079E-007          |             |             |
| Zscore: Socioeconomic index | -1.501E-006  |                                                                |                                                                | -1.349E-007                                                    | 8.860E-008          |             |             |
| ZBY_P801_sq                 | 6.619E-007   |                                                                |                                                                | 5.338E-008                                                     | 5.013E-007          |             |             |
| Zscore: Extraversion Factor | 6.892E-008   |                                                                |                                                                | -5.619E-007                                                    | 4.416E-008          |             |             |
| BY_RACEwefcode              | 2.087E-005   |                                                                |                                                                | -1.198E-007                                                    | 1.524E-006          |             |             |
| ZFAC2_1_sq                  | -1.198E-007  |                                                                |                                                                | 3.340E-006                                                     | 4.368E-008          |             |             |
| ZIQ_comp_vms_sq             | 1.524E-006   |                                                                |                                                                | 4.368E-008                                                     | 4.409E-006          |             |             |
| Zscore(IQ_comp_vms)         | -2.766E-006  |                                                                |                                                                | -4.312E-007                                                    | -9.078E-007         |             |             |
| ZIQ_comp_vmsXZBY_P801       | 6.029E-007   |                                                                |                                                                | -1.124E-007                                                    | -2.654E-006         |             |             |

**Coefficient Correlations<sup>a,b</sup>**

| Model       |              | Zscore<br>(IQ_comp_vms)                                        | ZIQ_comp_vmsXZBY_P801 |
|-------------|--------------|----------------------------------------------------------------|-----------------------|
| 2           | Correlations | Zscore: Grade in which student was enrolled at time of testing | .017                  |
|             |              | ZFAC2_1XZBY_P801                                               | .000                  |
|             |              | BY_SEXefcode                                                   | -.018                 |
|             |              | Zscore: Socioeconomic index                                    | -.059                 |
|             |              | ZBY_P801_sq                                                    | -.510                 |
|             |              | Zscore: Extraversion Factor                                    | .020                  |
|             |              | BY_RACEwefcode                                                 | .047                  |
|             |              | ZFAC2_1_sq                                                     | -.022                 |
|             |              | ZIQ_comp_vms_sq                                                | -.452                 |
|             |              | Zscore(IQ_comp_vms)                                            | -.002                 |
|             |              | ZIQ_comp_vmsXZBY_P801                                          | 1.000                 |
|             |              |                                                                | -.002                 |
|             |              |                                                                | 1.000                 |
|             |              |                                                                |                       |
| Covariances |              | Zscore: Grade in which student was enrolled at time of testing | 1.070E-007            |
|             |              | ZFAC2_1XZBY_P801                                               | 2.674E-009            |
|             |              | BY_SEXefcode                                                   | -1.140E-007           |
|             |              | Zscore: Socioeconomic index                                    | -4.058E-007           |
|             |              | ZBY_P801_sq                                                    | -2.839E-006           |
|             |              | Zscore: Extraversion Factor                                    | 1.237E-007            |
|             |              | BY_RACEwefcode                                                 | 6.029E-007            |
|             |              | ZFAC2_1_sq                                                     | -1.124E-007           |
|             |              | ZIQ_comp_vms_sq                                                | -2.654E-006           |
|             |              | Zscore(IQ_comp_vms)                                            | -1.201E-008           |
|             |              | ZIQ_comp_vmsXZBY_P801                                          | 7.826E-006            |
|             |              |                                                                | -1.201E-008           |
|             |              |                                                                |                       |
|             |              |                                                                |                       |

a. Dependent Variable: Estimated annual earnings on current job (natural logarithm)

b. Weighted Least Squares Regression - Weighted by Eleven-year followup weight B

REGRESSION

/MISSING LISTWISE

/REGWGT=Y11\_WTB



```

/STATISTICS COEFF OUTS CI(95) R ANOVA BCOV CHANGE
/CRITERIA=PIN(.05) POUT(.10)
/NOORIGIN
/DEPENDENT Y11_TSEI2
/METHOD=ENTER ZFAC2_1 ZBY_P801 ZFAC2_1XZBY_P801 ZFAC2_1_sq ZBY_P801_sq BY_S
EXefcode BY_RACEwefcode ZBY_TESTGRD
/METHOD=ENTER ZIQ_comp_vms ZIQ_comp_vms_sq ZIQ_comp_vmsXZBY_P801.

```

## Regression

[DataSet1] C:\Users\ridamian\Dropbox\PT\PT Paper\PT base year and follow up 1  
1-18-11\_Rodica2\_credible only\_1\_used for paper\_20.sav

**Variables Entered/Removed<sup>a,b</sup>**

| Model | Variables Entered                                                                                                                                                                                                                                                         | Variables Removed | Method |
|-------|---------------------------------------------------------------------------------------------------------------------------------------------------------------------------------------------------------------------------------------------------------------------------|-------------------|--------|
| 1     | Zscore:<br>Grade in<br>which student<br>was enrolled<br>at time of<br>testing,<br>ZFAC2_1XZB<br>Y_P801,<br>BY_SEXefcod<br>e, Zscore:<br>Socioeconomi<br>c index,<br>ZBY_P801_sq<br>, Zscore:<br>Extraversion<br>Factor,<br>BY_RACEwef<br>code,<br>ZFAC2_1_sq <sup>c</sup> |                   | Enter  |
| 2     | ZIQ_comp_v<br>ms_sq,<br>Zscore<br>(IQ_comp_vm<br>s),<br>ZIQ_comp_v<br>msXZBY_P80<br>1 <sup>c</sup>                                                                                                                                                                        |                   | Enter  |

a. Dependent Variable: Y11 occupational prestige scores

b. Weighted Least Squares Regression - Weighted by Eleven-year followup weight B

c. All requested variables entered.

**Model Summary**

| Model | R                 | R Square | Adjusted R Square | Std. Error of the Estimate | Change Statistics |          |     |
|-------|-------------------|----------|-------------------|----------------------------|-------------------|----------|-----|
|       |                   |          |                   |                            | R Square Change   | F Change | df1 |
| 1     | .388 <sup>a</sup> | .150     | .150              | 546.33519                  | .150              | 1182.684 | 8   |
| 2     | .524 <sup>b</sup> | .274     | .274              | 504.96076                  | .124              | 3044.812 | 3   |

**Model Summary**

| Model | Change Statistics |               |
|-------|-------------------|---------------|
|       | df2               | Sig. F Change |
| 1     | 53530             | .000          |
| 2     | 53527             | .000          |

- a. Predictors: (Constant), Zscore: Grade in which student was enrolled at time of testing, ZFAC2\_1XZBY\_P801, BY\_SEXefcode, Zscore: Socioeconomic index, ZBY\_P801\_sq, Zscore: Extraversion Factor, BY\_RACEwefcode, ZFAC2\_1\_sq
- b. Predictors: (Constant), Zscore: Grade in which student was enrolled at time of testing, ZFAC2\_1XZBY\_P801, BY\_SEXefcode, Zscore: Socioeconomic index, ZBY\_P801\_sq, Zscore: Extraversion Factor, BY\_RACEwefcode, ZFAC2\_1\_sq, ZIQ\_comp\_vms\_sq, Zscore(IQ\_comp\_vms), ZIQ\_comp\_vmsXZBY\_P801

**ANOVA<sup>a,b</sup>**

| Model |            | Sum of Squares | df    | Mean Square | F        | Sig.              |
|-------|------------|----------------|-------|-------------|----------|-------------------|
| 1     | Regression | 2824079565     | 8     | 353009945.6 | 1182.684 | .000 <sup>c</sup> |
|       | Residual   | 15977748911    | 53530 | 298482.139  |          |                   |
|       | Total      | 18801828475    | 53538 |             |          |                   |
| 2     | Regression | 5153226706     | 11    | 468475155.1 | 1837.263 | .000 <sup>d</sup> |
|       | Residual   | 13648601769    | 53527 | 254985.368  |          |                   |
|       | Total      | 18801828475    | 53538 |             |          |                   |

- a. Dependent Variable: Y11 occupational prestige scores
- b. Weighted Least Squares Regression - Weighted by Eleven-year followup weight B
- c. Predictors: (Constant), Zscore: Grade in which student was enrolled at time of testing, ZFAC2\_1XZBY\_P801, BY\_SEXefcode, Zscore: Socioeconomic index, ZBY\_P801\_sq, Zscore: Extraversion Factor, BY\_RACEwefcode, ZFAC2\_1\_sq
- d. Predictors: (Constant), Zscore: Grade in which student was enrolled at time of testing, ZFAC2\_1XZBY\_P801, BY\_SEXefcode, Zscore: Socioeconomic index, ZBY\_P801\_sq, Zscore: Extraversion Factor, BY\_RACEwefcode, ZFAC2\_1\_sq, ZIQ\_comp\_vms\_sq, Zscore(IQ\_comp\_vms), ZIQ\_comp\_vmsXZBY\_P801

**Coefficients<sup>a,b</sup>**

| Model |                                                                | Unstandardized Coefficients |            | Standardized Coefficients | t       | Sig. |
|-------|----------------------------------------------------------------|-----------------------------|------------|---------------------------|---------|------|
|       |                                                                | B                           | Std. Error | Beta                      |         |      |
| 1     | (Constant)                                                     | 40.039                      | .190       |                           | 210.478 | .000 |
|       | Zscore: Extraversion Factor                                    | 1.367                       | .086       | .066                      | 15.943  | .000 |
|       | Zscore: Socioeconomic index                                    | 6.992                       | .087       | .337                      | 80.780  | .000 |
|       | ZFAC2_1XZBY_P801                                               | -.532                       | .086       | -.026                     | -6.184  | .000 |
|       | ZFAC2_1_sq                                                     | .933                        | .069       | .057                      | 13.532  | .000 |
|       | ZBY_P801_sq                                                    | 1.007                       | .064       | .064                      | 15.645  | .000 |
|       | BY_SEXefcode                                                   | -2.111                      | .086       | -.098                     | -24.417 | .000 |
|       | BY_RACEwefcode                                                 | -.043                       | .164       | -.001                     | -.262   | .793 |
|       | Zscore: Grade in which student was enrolled at time of testing | .437                        | .083       | .021                      | 5.283   | .000 |
| 2     | (Constant)                                                     | 42.146                      | .199       |                           | 212.042 | .000 |
|       | Zscore: Extraversion Factor                                    | 1.259                       | .079       | .061                      | 15.883  | .000 |
|       | Zscore: Socioeconomic index                                    | 4.010                       | .086       | .194                      | 46.664  | .000 |
|       | ZFAC2_1XZBY_P801                                               | -.217                       | .080       | -.011                     | -2.724  | .006 |
|       | ZFAC2_1_sq                                                     | .354                        | .064       | .022                      | 5.521   | .000 |
|       | ZBY_P801_sq                                                    | .586                        | .070       | .037                      | 8.421   | .000 |
|       | BY_SEXefcode                                                   | -1.165                      | .081       | -.054                     | -14.464 | .000 |
|       | BY_RACEwefcode                                                 | -2.785                      | .159       | -.071                     | -17.468 | .000 |
|       | Zscore: Grade in which student was enrolled at time of testing | -1.663                      | .080       | -.081                     | -20.888 | .000 |
|       | Zscore(IQ_comp_vms)                                            | 8.393                       | .092       | .407                      | 90.987  | .000 |
|       | ZIQ_comp_vms_sq                                                | .589                        | .073       | .035                      | 8.034   | .000 |
|       | ZIQ_comp_vmsXZBY_P801                                          | .367                        | .097       | .019                      | 3.777   | .000 |

**Coefficients<sup>a,b</sup>**

| Model |                                                                | 95.0% Confidence Interval for B |             |
|-------|----------------------------------------------------------------|---------------------------------|-------------|
|       |                                                                | Lower Bound                     | Upper Bound |
| 1     | (Constant)                                                     | 39.666                          | 40.412      |
|       | Zscore: Extraversion Factor                                    | 1.199                           | 1.535       |
|       | Zscore: Socioeconomic index                                    | 6.823                           | 7.162       |
|       | ZFAC2_1XZBY_P801                                               | -.700                           | -.363       |
|       | ZFAC2_1_sq                                                     | .798                            | 1.068       |
|       | ZBY_P801_sq                                                    | .880                            | 1.133       |
|       | BY_SEXefcode                                                   | -2.280                          | -1.942      |
|       | BY_RACEwefcode                                                 | -.365                           | .279        |
|       | Zscore: Grade in which student was enrolled at time of testing | .275                            | .599        |
| 2     | (Constant)                                                     | 41.756                          | 42.535      |
|       | Zscore: Extraversion Factor                                    | 1.104                           | 1.414       |
|       | Zscore: Socioeconomic index                                    | 3.842                           | 4.178       |
|       | ZFAC2_1XZBY_P801                                               | -.373                           | -.061       |
|       | ZFAC2_1_sq                                                     | .228                            | .479        |
|       | ZBY_P801_sq                                                    | .450                            | .723        |
|       | BY_SEXefcode                                                   | -1.323                          | -1.007      |
|       | BY_RACEwefcode                                                 | -3.098                          | -2.473      |
|       | Zscore: Grade in which student was enrolled at time of testing | -1.819                          | -1.507      |
|       | Zscore(IQ_comp_vms)                                            | 8.212                           | 8.574       |
|       | ZIQ_comp_vms_sq                                                | .446                            | .733        |
|       | ZIQ_comp_vmsXZBY_P801                                          | .177                            | .558        |

a. Dependent Variable: Y11 occupational prestige scores

b. Weighted Least Squares Regression - Weighted by Eleven-year followup weight B

**Excluded Variables<sup>a,b</sup>**

| Model | Beta In               | t                 | Sig.   | Partial Correlation | Collinearity Statistics |      |
|-------|-----------------------|-------------------|--------|---------------------|-------------------------|------|
|       |                       |                   |        |                     | Tolerance               |      |
| 1     | Zscore(IQ_comp_vms)   | .417 <sup>c</sup> | 94.772 | .000                | .379                    | .702 |
|       | ZIQ_comp_vms_sq       | .110 <sup>c</sup> | 26.723 | .000                | .115                    | .929 |
|       | ZIQ_comp_vmsXZBY_P801 | .078 <sup>c</sup> | 16.575 | .000                | .071                    | .706 |

a. Dependent Variable: Y11 occupational prestige scores

b. Weighted Least Squares Regression - Weighted by Eleven-year followup weight B

c. Predictors in the Model: (Constant), Zscore: Grade in which student was enrolled at time of testing, ZFAC2\_1XZBY\_P801, BY\_SEXefcode, Zscore: Socioeconomic index, ZBY\_P801\_sq, Zscore: Extraversion Factor, BY\_RACEwefcode, ZFAC2\_1\_sq

**Coefficient Correlations<sup>a,b</sup>**

| Model |                | Zscore: Grade in which student was enrolled at time of testing | ZFAC2_1XZBY_P801 | BY_SEXefcode |             |
|-------|----------------|----------------------------------------------------------------|------------------|--------------|-------------|
| 1     | Correlations   | Zscore: Grade in which student was enrolled at time of testing | 1.000            | .019         | .032        |
|       |                | ZFAC2_1XZBY_P801                                               | .019             | 1.000        | .011        |
|       |                | BY_SEXefcode                                                   | .032             | .011         | 1.000       |
|       |                | Zscore: Socioeconomic index                                    | -.064            | .004         | .001        |
|       |                | ZBY_P801_sq                                                    | .056             | -.183        | .005        |
|       |                | Zscore: Extraversion Factor                                    | -.063            | -.141        | -.010       |
|       |                | BY_RACEwefcode                                                 | -.033            | -.012        | .119        |
|       |                | ZFAC2_1_sq                                                     | -.024            | -.228        | -.053       |
|       | Covariances    | Zscore: Grade in which student was enrolled at time of testing | .007             | .000         | .000        |
|       |                | ZFAC2_1XZBY_P801                                               | .000             | .007         | 8.380E-005  |
|       |                | BY_SEXefcode                                                   | .000             | 8.380E-005   | .007        |
|       |                | Zscore: Socioeconomic index                                    | .000             | 2.737E-005   | 9.190E-006  |
|       |                | ZBY_P801_sq                                                    | .000             | -.001        | 2.902E-005  |
|       |                | Zscore: Extraversion Factor                                    | .000             | -.001        | -7.353E-005 |
|       | BY_RACEwefcode | .000                                                           | .000             | .002         |             |
|       | ZFAC2_1_sq     | .000                                                           | -.001            | .000         |             |

**Coefficient Correlations<sup>a,b</sup>**

| Model |              |                                                                | Zscore:<br>Socioeconomic index | ZBY_P801_sq | Zscore:<br>Extraversion Factor |
|-------|--------------|----------------------------------------------------------------|--------------------------------|-------------|--------------------------------|
| 1     | Correlations | Zscore: Grade in which student was enrolled at time of testing | -.064                          | .056        | -.063                          |
|       |              | ZFAC2_1XZBY_P801                                               | .004                           | -.183       | -.141                          |
|       |              | BY_SEXefcode                                                   | .001                           | .005        | -.010                          |
|       |              | Zscore: Socioeconomic index                                    | 1.000                          | -.050       | -.134                          |
|       |              | ZBY_P801_sq                                                    | -.050                          | 1.000       | .007                           |
|       |              | Zscore: Extraversion Factor                                    | -.134                          | .007        | 1.000                          |
|       |              | BY_RACEwefcode                                                 | -.230                          | .145        | .006                           |
|       |              | ZFAC2_1_sq                                                     | -.071                          | .003        | -.145                          |
|       | Covariances  | Zscore: Grade in which student was enrolled at time of testing | .000                           | .000        | .000                           |
|       |              | ZFAC2_1XZBY_P801                                               | 2.737E-005                     | -.001       | -.001                          |
|       |              | BY_SEXefcode                                                   | 9.190E-006                     | 2.902E-005  | -7.353E-005                    |
|       |              | Zscore: Socioeconomic index                                    | .007                           | .000        | -.001                          |
|       |              | ZBY_P801_sq                                                    | .000                           | .004        | 3.864E-005                     |
|       |              | Zscore: Extraversion Factor                                    | -.001                          | 3.864E-005  | .007                           |
|       |              | BY_RACEwefcode                                                 | -.003                          | .002        | 8.808E-005                     |
|       |              | ZFAC2_1_sq                                                     | .000                           | 1.213E-005  | -.001                          |

**Coefficient Correlations<sup>a,b</sup>**

| Model |              |                                                                | BY_RACEwef<br>code | ZFAC2_1_sq | ZIQ_comp_v<br>ms_sq |
|-------|--------------|----------------------------------------------------------------|--------------------|------------|---------------------|
| 1     | Correlations | Zscore: Grade in which student was enrolled at time of testing | -.033              | -.024      |                     |
|       |              | ZFAC2_1XZBY_P801                                               | -.012              | -.228      |                     |
|       |              | BY_SEXefcode                                                   | .119               | -.053      |                     |
|       |              | Zscore: Socioeconomic index                                    | -.230              | -.071      |                     |
|       |              | ZBY_P801_sq                                                    | .145               | .003       |                     |
|       |              | Zscore: Extraversion Factor                                    | .006               | -.145      |                     |
|       |              | BY_RACEwefcode                                                 | 1.000              | -.029      |                     |
|       |              | ZFAC2_1_sq                                                     | -.029              | 1.000      |                     |
|       | Covariances  | Zscore: Grade in which student was enrolled at time of testing | .000               | .000       |                     |
|       |              | ZFAC2_1XZBY_P801                                               | .000               | -.001      |                     |
|       |              | BY_SEXefcode                                                   | .002               | .000       |                     |
|       |              | Zscore: Socioeconomic index                                    | -.003              | .000       |                     |
|       |              | ZBY_P801_sq                                                    | .002               | 1.213E-005 |                     |
|       |              | Zscore: Extraversion Factor                                    | 8.808E-005         | -.001      |                     |
|       |              | BY_RACEwefcode                                                 | .027               | .000       |                     |
|       |              | ZFAC2_1_sq                                                     | .000               | .005       |                     |

**Coefficient Correlations<sup>a,b</sup>**

| Model |              | Zscore<br>(IQ_comp_vms)                                                                                                                                                                                         | ZIQ_comp_vmsXZBY_P801 |
|-------|--------------|-----------------------------------------------------------------------------------------------------------------------------------------------------------------------------------------------------------------|-----------------------|
| 1     | Correlations | Zscore: Grade in which student was enrolled at time of testing<br>ZFAC2_1XZBY_P801<br>BY_SEXefcode<br>Zscore: Socioeconomic index<br>ZBY_P801_sq<br>Zscore: Extraversion Factor<br>BY_RACEwefcode<br>ZFAC2_1_sq |                       |
|       | Covariances  | Zscore: Grade in which student was enrolled at time of testing<br>ZFAC2_1XZBY_P801<br>BY_SEXefcode<br>Zscore: Socioeconomic index<br>ZBY_P801_sq<br>Zscore: Extraversion Factor<br>BY_RACEwefcode<br>ZFAC2_1_sq |                       |



**Coefficient Correlations<sup>a,b</sup>**

| Model                       |              | Zscore:<br>Grade in<br>which student<br>was enrolled<br>at time of<br>testing | ZFAC2_1XZB<br>Y_P801                                           | BY_SEXefcod<br>e |             |             |      |
|-----------------------------|--------------|-------------------------------------------------------------------------------|----------------------------------------------------------------|------------------|-------------|-------------|------|
| 2                           | Correlations | Zscore: Grade in which student was enrolled at time of testing                | 1.000                                                          | .007             | -.005       |             |      |
|                             |              | ZFAC2_1XZBY_P801                                                              | .007                                                           | 1.000            | .016        |             |      |
|                             |              | BY_SEXefcode                                                                  | -.005                                                          | .016             | 1.000       |             |      |
|                             |              | Zscore: Socioeconomic index                                                   | .041                                                           | -.012            | -.042       |             |      |
|                             |              | ZBY_P801_sq                                                                   | .052                                                           | -.154            | .009        |             |      |
|                             |              | Zscore: Extraversion Factor                                                   | -.057                                                          | -.141            | -.011       |             |      |
|                             |              | BY_RACEwefcode                                                                | .016                                                           | -.021            | .093        |             |      |
|                             |              | ZFAC2_1_sq                                                                    | .003                                                           | -.230            | -.063       |             |      |
|                             |              | ZIQ_comp_vms_sq                                                               | -.053                                                          | -.001            | .038        |             |      |
|                             |              | Zscore(IQ_comp_vms)                                                           | -.258                                                          | .043             | .114        |             |      |
|                             |              | ZIQ_comp_vmsXZBY_P801                                                         | .016                                                           | -.006            | -.024       |             |      |
|                             |              | Covariances                                                                   | Zscore: Grade in which student was enrolled at time of testing | .006             | 4.134E-005  | -2.959E-005 |      |
|                             |              |                                                                               |                                                                | ZFAC2_1XZBY_P801 | 4.134E-005  | .006        | .000 |
|                             |              |                                                                               |                                                                | BY_SEXefcode     | -2.959E-005 | .000        | .006 |
| Zscore: Socioeconomic index | .000         |                                                                               |                                                                | -8.011E-005      | .000        |             |      |
| ZBY_P801_sq                 | .000         |                                                                               |                                                                | -.001            | 5.288E-005  |             |      |
| Zscore: Extraversion Factor | .000         |                                                                               |                                                                | -.001            | -7.308E-005 |             |      |
| BY_RACEwefcode              | .000         |                                                                               |                                                                | .000             | .001        |             |      |
| ZFAC2_1_sq                  | 1.384E-005   |                                                                               |                                                                | -.001            | .000        |             |      |
| ZIQ_comp_vms_sq             | .000         |                                                                               |                                                                | -7.503E-006      | .000        |             |      |
| Zscore(IQ_comp_vms)         | -.002        |                                                                               |                                                                | .000             | .001        |             |      |
| ZIQ_comp_vmsXZBY_P801       | .000         | -4.258E-005                                                                   | .000                                                           |                  |             |             |      |

**Coefficient Correlations<sup>a,b</sup>**

| Model |              |                                                                | Zscore:<br>Socioeconomic<br>index | ZBY_P801_sq | Zscore:<br>Extraversion<br>Factor |
|-------|--------------|----------------------------------------------------------------|-----------------------------------|-------------|-----------------------------------|
| 2     | Correlations | Zscore: Grade in which student was enrolled at time of testing | .041                              | .052        | -.057                             |
|       |              | ZFAC2_1XZBY_P801                                               | -.012                             | -.154       | -.141                             |
|       |              | BY_SEXefcode                                                   | -.042                             | .009        | -.011                             |
|       |              | Zscore: Socioeconomic index                                    | 1.000                             | -.009       | -.119                             |
|       |              | ZBY_P801_sq                                                    | -.009                             | 1.000       | -.001                             |
|       |              | Zscore: Extraversion Factor                                    | -.119                             | -.001       | 1.000                             |
|       |              | BY_RACEwefcode                                                 | -.133                             | .076        | .015                              |
|       |              | ZFAC2_1_sq                                                     | -.031                             | .012        | -.143                             |
|       |              | ZIQ_comp_vms_sq                                                | .005                              | .115        | .018                              |
|       |              | Zscore(IQ_comp_vms)                                            | -.353                             | .004        | -.022                             |
|       |              | ZIQ_comp_vmsXZBY_P801                                          | -.038                             | -.505       | .010                              |
|       | Covariances  | Zscore: Grade in which student was enrolled at time of testing | .000                              | .000        | .000                              |
|       |              | ZFAC2_1XZBY_P801                                               | -8.011E-005                       | -.001       | -.001                             |
|       |              | BY_SEXefcode                                                   | .000                              | 5.288E-005  | -7.308E-005                       |
|       |              | Zscore: Socioeconomic index                                    | .007                              | -5.282E-005 | -.001                             |
|       |              | ZBY_P801_sq                                                    | -5.282E-005                       | .005        | -7.719E-006                       |
|       |              | Zscore: Extraversion Factor                                    | -.001                             | -7.719E-006 | .006                              |
|       |              | BY_RACEwefcode                                                 | -.002                             | .001        | .000                              |
|       |              | ZFAC2_1_sq                                                     | .000                              | 5.501E-005  | -.001                             |
|       |              | ZIQ_comp_vms_sq                                                | 3.460E-005                        | .001        | .000                              |
|       |              | Zscore(IQ_comp_vms)                                            | -.003                             | 2.369E-005  | .000                              |
|       |              | ZIQ_comp_vmsXZBY_P801                                          | .000                              | -.003       | 7.438E-005                        |

**Coefficient Correlations<sup>a,b</sup>**

| Model                       |              |                                                                | BY_RACEwef<br>code                                             | ZFAC2_1_sq       | ZIQ_comp_v<br>ms_sq |            |             |
|-----------------------------|--------------|----------------------------------------------------------------|----------------------------------------------------------------|------------------|---------------------|------------|-------------|
| 2                           | Correlations | Zscore: Grade in which student was enrolled at time of testing | .016                                                           | .003             | -.053               |            |             |
|                             |              | ZFAC2_1XZBY_P801                                               | -.021                                                          | -.230            | -.001               |            |             |
|                             |              | BY_SEXefcode                                                   | .093                                                           | -.063            | .038                |            |             |
|                             |              | Zscore: Socioeconomic index                                    | -.133                                                          | -.031            | .005                |            |             |
|                             |              | ZBY_P801_sq                                                    | .076                                                           | .012             | .115                |            |             |
|                             |              | Zscore: Extraversion Factor                                    | .015                                                           | -.143            | .018                |            |             |
|                             |              | BY_RACEwefcode                                                 | 1.000                                                          | -.009            | .173                |            |             |
|                             |              | ZFAC2_1_sq                                                     | -.009                                                          | 1.000            | .005                |            |             |
|                             |              | ZIQ_comp_vms_sq                                                | .173                                                           | .005             | 1.000               |            |             |
|                             |              | Zscore(IQ_comp_vms)                                            | -.245                                                          | -.092            | -.163               |            |             |
|                             |              | ZIQ_comp_vmsXZBY_P801                                          | .045                                                           | -.014            | -.441               |            |             |
|                             |              | Covariances                                                    | Zscore: Grade in which student was enrolled at time of testing |                  | .000                | 1.384E-005 | .000        |
|                             |              |                                                                |                                                                | ZFAC2_1XZBY_P801 | .000                | -.001      | -7.503E-006 |
| BY_SEXefcode                | .001         |                                                                |                                                                | .000             | .000                |            |             |
| Zscore: Socioeconomic index | -.002        |                                                                |                                                                | .000             | 3.460E-005          |            |             |
| ZBY_P801_sq                 | .001         |                                                                |                                                                | 5.501E-005       | .001                |            |             |
| Zscore: Extraversion Factor | .000         |                                                                |                                                                | -.001            | .000                |            |             |
| BY_RACEwefcode              | .025         |                                                                |                                                                | -8.987E-005      | .002                |            |             |
| ZFAC2_1_sq                  | -8.987E-005  |                                                                |                                                                | .004             | 2.282E-005          |            |             |
| ZIQ_comp_vms_sq             | .002         |                                                                |                                                                | 2.282E-005       | .005                |            |             |
| Zscore(IQ_comp_vms)         | -.004        |                                                                |                                                                | -.001            | -.001               |            |             |
| ZIQ_comp_vmsXZBY_P801       | .001         |                                                                |                                                                | -8.652E-005      | -.003               |            |             |

**Coefficient Correlations<sup>a,b</sup>**

| Model                 |                             | Zscore<br>(IQ_comp_vms)                                        | ZIQ_comp_vmsXZBY_P801                                          |             |
|-----------------------|-----------------------------|----------------------------------------------------------------|----------------------------------------------------------------|-------------|
| 2                     | Correlations                | Zscore: Grade in which student was enrolled at time of testing | .016                                                           |             |
|                       |                             | ZFAC2_1XZBY_P801                                               | -.006                                                          |             |
|                       |                             | BY_SEXefcode                                                   | -.024                                                          |             |
|                       |                             | Zscore: Socioeconomic index                                    | -.038                                                          |             |
|                       |                             | ZBY_P801_sq                                                    | -.505                                                          |             |
|                       |                             | Zscore: Extraversion Factor                                    | .010                                                           |             |
|                       |                             | BY_RACEwefcode                                                 | .045                                                           |             |
|                       |                             | ZFAC2_1_sq                                                     | -.014                                                          |             |
|                       |                             | ZIQ_comp_vms_sq                                                | -.441                                                          |             |
|                       |                             | Zscore(IQ_comp_vms)                                            | 1.000                                                          |             |
|                       |                             | ZIQ_comp_vmsXZBY_P801                                          | 1.000                                                          |             |
|                       |                             | Covariances                                                    | Zscore: Grade in which student was enrolled at time of testing | -.002       |
|                       | ZFAC2_1XZBY_P801            |                                                                | .000                                                           | -4.258E-005 |
|                       | BY_SEXefcode                |                                                                | .001                                                           | .000        |
|                       | Zscore: Socioeconomic index |                                                                | -.003                                                          | .000        |
|                       | ZBY_P801_sq                 |                                                                | 2.369E-005                                                     | -.003       |
|                       | Zscore: Extraversion Factor |                                                                | .000                                                           | 7.438E-005  |
|                       | BY_RACEwefcode              |                                                                | -.004                                                          | .001        |
|                       | ZFAC2_1_sq                  | -.001                                                          | -8.652E-005                                                    |             |
| ZIQ_comp_vms_sq       | -.001                       | -.003                                                          |                                                                |             |
| Zscore(IQ_comp_vms)   | .009                        | .000                                                           |                                                                |             |
| ZIQ_comp_vmsXZBY_P801 | .000                        | .009                                                           |                                                                |             |

a. Dependent Variable: Y11 occupational prestige scores

b. Weighted Least Squares Regression - Weighted by Eleven-year followup weight B
